# Supplementary material for: Determination of an Optimal Oil Jet Nozzle Layout for Helical Gear Lubrication: Mathematical Modeling, Numerical Simulation, and Experimental Validation
Source: Hindawi journal article supplement (doi:10.1155/2020/2187027), 2020-05-12
Supplement: f1 [file 2187027.f1.zip]

Archive with 17 entries (16 files):
- 2187027.f1/helical gear(complexity).docx
- 2187027.f1/run/
- 2187027.f1/run/background.jpg
- 2187027.f1/run/face_gear.fig
- 2187027.f1/run/face_gear.m
- 2187027.f1/run/func.m
- 2187027.f1/run/helical_gear.fig
- 2187027.f1/run/helical_gear.m
- 2187027.f1/run/index.fig
- 2187027.f1/run/index.m
- 2187027.f1/run/invv.m
- 2187027.f1/run/myfun.m
- 2187027.f1/run/myfun1.m
- 2187027.f1/run/spiral_bevel_gear.fig
- 2187027.f1/run/spiral_bevel_gear.m
- 2187027.f1/run/spur_gear.fig
- 2187027.f1/run/spur_gear.m
