# Supplementary material for: Determination of an Optimal Oil Jet Nozzle Layout for Helical Gear Lubrication: Mathematical Modeling, Numerical Simulation, and Experimental Validation
Source: Hindawi journal article supplement (doi:10.1155/2020/2187027), 2020-05-12
Supplement: f1 [file 2187027.f1.zip › 2187027.f1/helical gear(complexity).docx]

1. Impingement depth

For the helical gear pair with different parameters, in order to calculate its impingement depth under different injection parameters quickly and accurately, a calculation platform for the impingement depth of helical gear injection lubrication is established by uSASDsing Matlab GUI software. As long as the user inputs the main gear parameters and nozzle layout parameters, the platform will use the background mathematical model to calculate, then the nozzle layout range and impingement depth value of helical gear can be obtained. Code can be viewed in m. File(run/helical_gear.m).


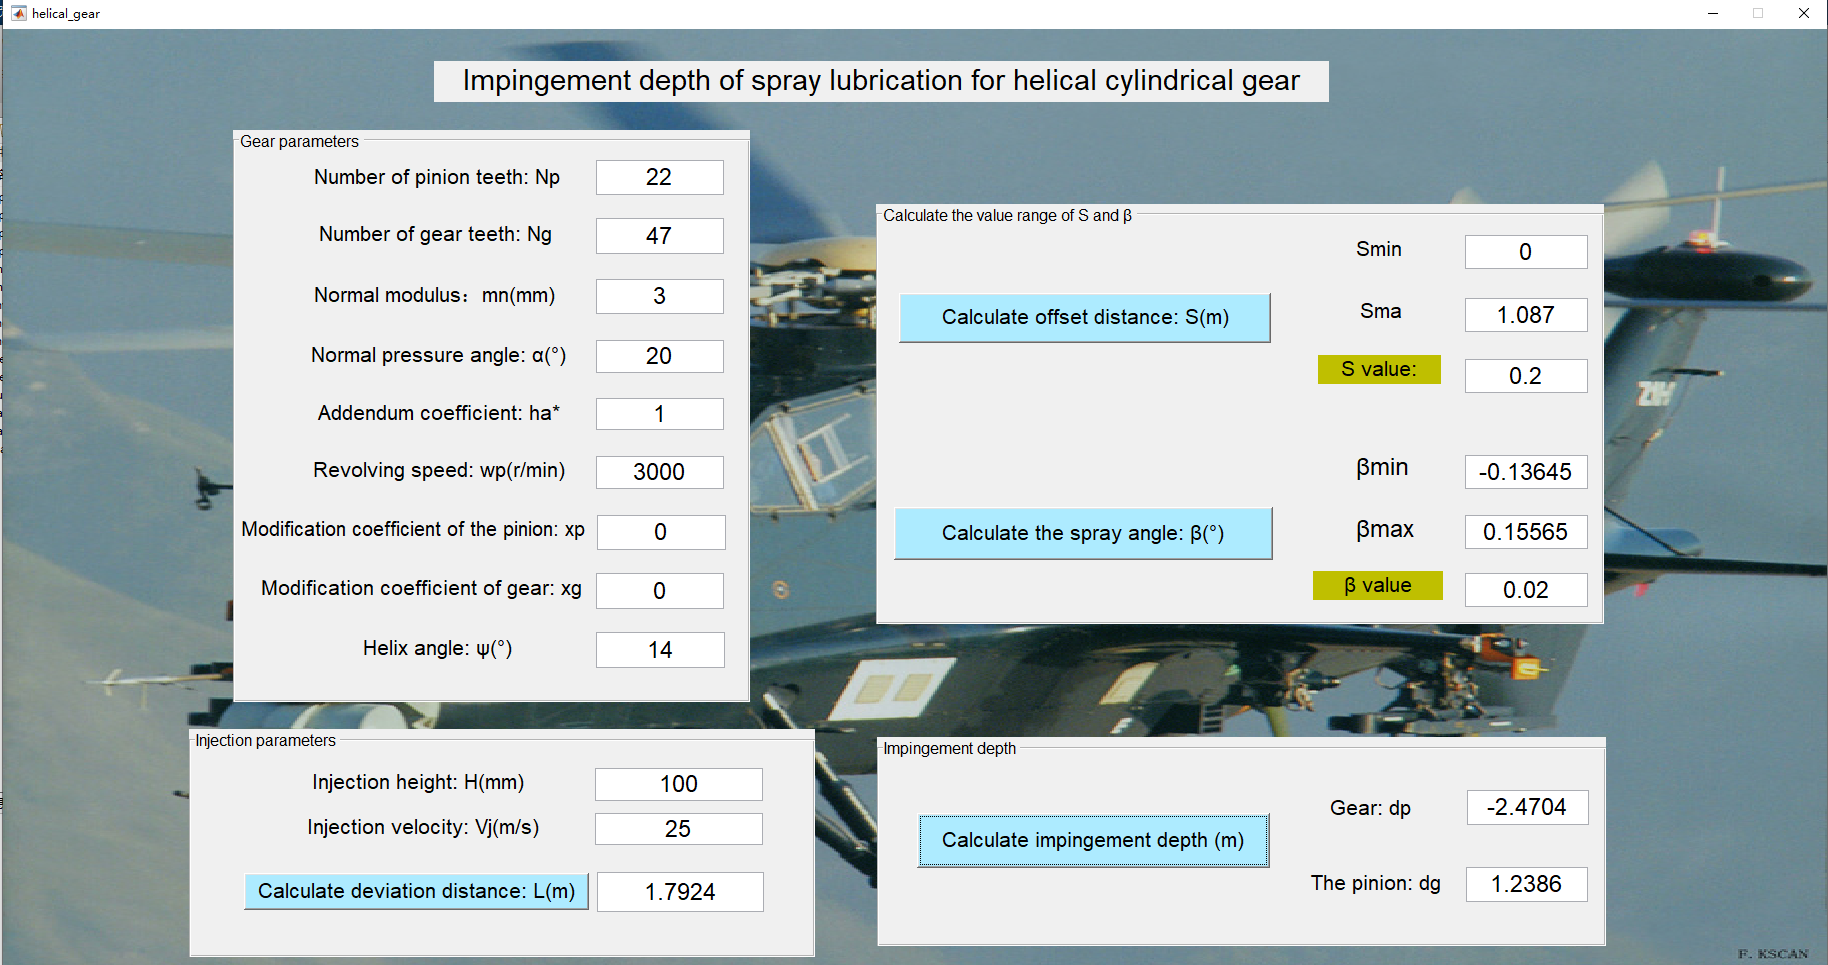


Figure1-1 The interface of the calculation platform for the impingement depth of oil injection lubrication of helical gears.

2. Simulation

The dynamic grid method is adopted and the program is written with a profiles file, as shown in Figure 2-1.


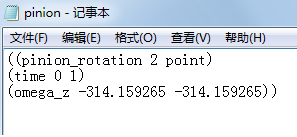

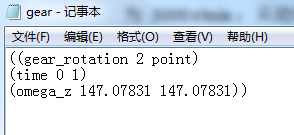


Figure 2-1 Profiles file

800 points near the helical gear are selected as the sampling data to study its velocity streamline. Figure 2-2 shows the velocity flow diagram around the gear pair at different injection angles, which can intuitively analyze the flow field characteristics around the gear pair under oil injection lubrication.


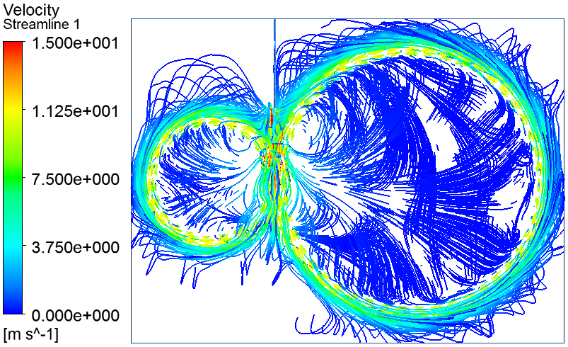

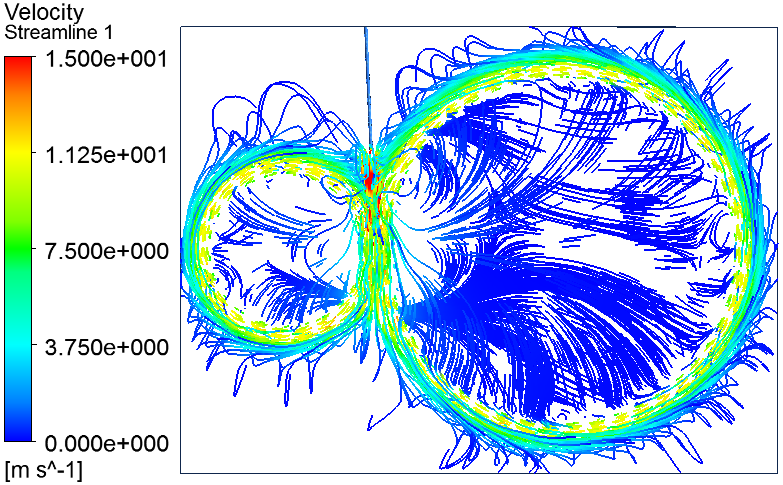


(a) (b)


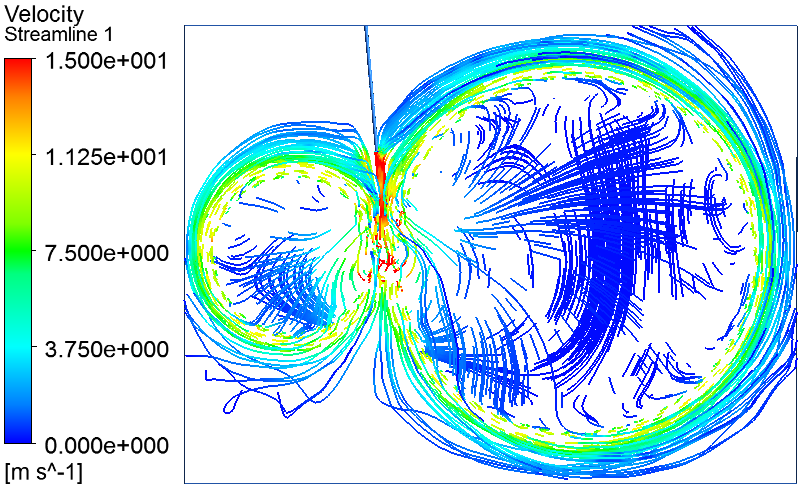

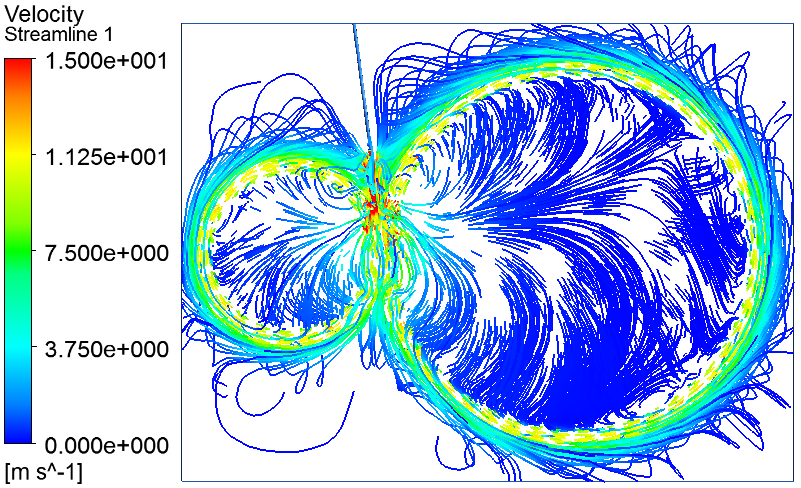


(c) (d)


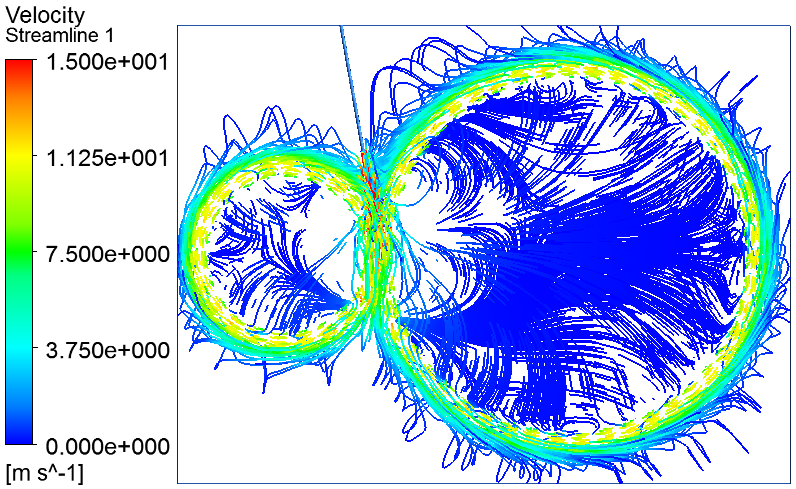


(e)

Figure 2-2 The velocity flow diagram under different injection angles: (a) 0°; (b) 2.5°; (c) 5°; (d) 7.5°; (e) 10°.

3. Experiments

The test rig is mainly composed of drive system, lubrication system, gearbox and measurement and control system. The specific design scheme is shown in Figure 3-1.


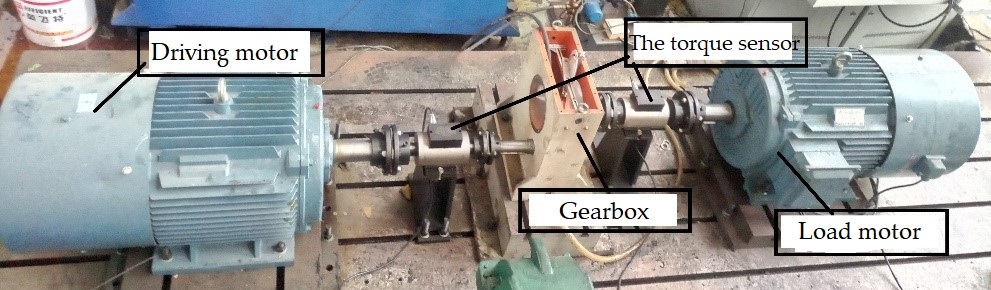


Figure 3-1 The test rig.

In this paper, the Ti32 infrared thermal imager(shown in Figure 3-2) of Fluke company is used to measure the gear tooth surface temperature, and its performance parameters are shown in Table 3-1.


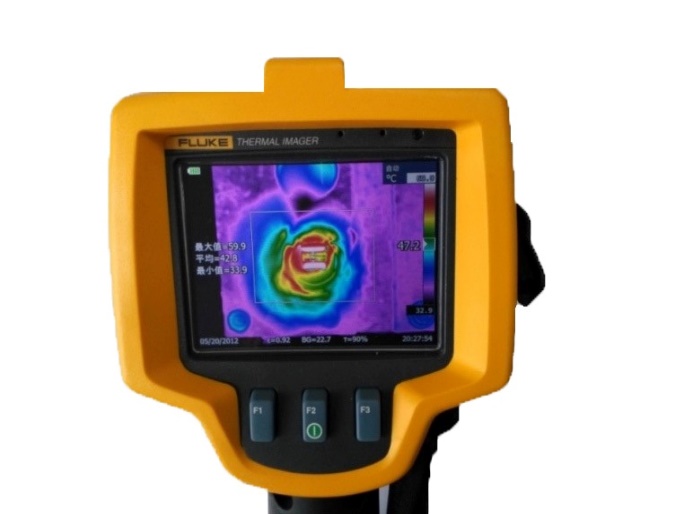


Figure3-2 Ti32 infrared thermal imager.

Table 3-1 Main performance parameters of Fluke Ti32 infrared thermal imager

| Parameter | Value |
| --- | --- |
| Detector pixel and type | 320*240 pixel, Uncooled type |
| Working band | 7.5~14μm |
| Thermal sensitivity | 0.045°C |
| Measuring range | -20~+600°C |
| Temperature measurement accuracy accuracy | ±2°C or 2% |
| Display size and pixel | 3.7 inch，640*480 pixel |

The test rig is fully digitized, and all operations can be realized in the control software interface, which is shown in Figure 3-3. The interface includes the real-time display of oil temperature, torque, speed and power of front-end and rear-end, and the test data curve can be drawn in real time.


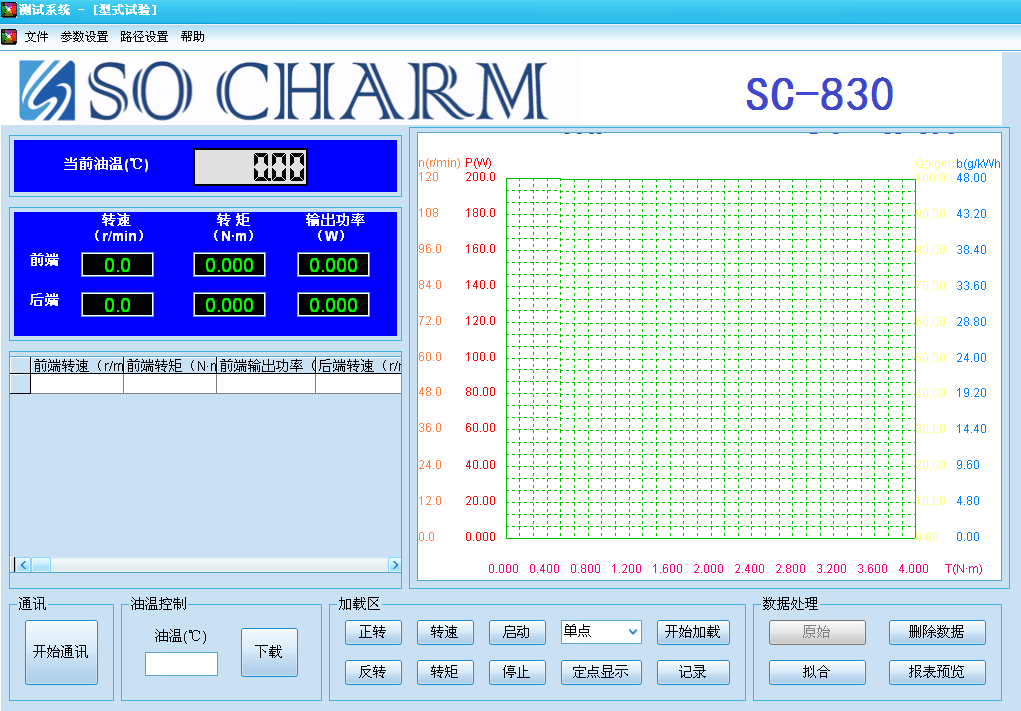


Figure 3-3 Control software interface
