# Supplementary material for: Determination of an Optimal Oil Jet Nozzle Layout for Helical Gear Lubrication: Mathematical Modeling, Numerical Simulation, and Experimental Validation
Source: Hindawi journal article supplement (doi:10.1155/2020/2187027), 2020-05-12
Supplement: f1 [file 2187027.f1.zip › 2187027.f1/run/face_gear.m]

function varargout = face_gear(varargin)
% FACE_GEAR MATLAB code for face_gear.fig
%      FACE_GEAR, by itself, creates a new FACE_GEAR or raises the existing
%      singleton*.
%
%      H = FACE_GEAR returns the handle to a new FACE_GEAR or the handle to
%      the existing singleton*.
%
%      FACE_GEAR('CALLBACK',hObject,eventData,handles,...) calls the local
%      function named CALLBACK in FACE_GEAR.M with the given input arguments.
%
%      FACE_GEAR('Property','Value',...) creates a new FACE_GEAR or raises the
%      existing singleton*.  Starting from the left, property value pairs are
%      applied to the GUI before face_gear_OpeningFcn gets called.  An
%      unrecognized property name or invalid value makes property application
%      stop.  All inputs are passed to face_gear_OpeningFcn via varargin.
%
%      *See GUI Options on GUIDE's Tools menu.  Choose "GUI allows only one
%      instance to run (singleton)".
%
% See also: GUIDE, GUIDATA, GUIHANDLES

% Edit the above text to modify the response to help face_gear

% Last Modified by GUIDE v2.5 24-Jun-2019 18:57:42

% Begin initialization code - DO NOT EDIT
gui_Singleton = 1;
gui_State = struct('gui_Name',       mfilename, ...
                   'gui_Singleton',  gui_Singleton, ...
                   'gui_OpeningFcn', @face_gear_OpeningFcn, ...
                   'gui_OutputFcn',  @face_gear_OutputFcn, ...
                   'gui_LayoutFcn',  [] , ...
                   'gui_Callback',   []);
if nargin && ischar(varargin{1})
    gui_State.gui_Callback = str2func(varargin{1});
end

if nargout
    [varargout{1:nargout}] = gui_mainfcn(gui_State, varargin{:});
else
    gui_mainfcn(gui_State, varargin{:});
end
% End initialization code - DO NOT EDIT


% --- Executes just before face_gear is made visible.
function face_gear_OpeningFcn(hObject, eventdata, handles, varargin)
% This function has no output args, see OutputFcn.
% hObject    handle to figure
% eventdata  reserved - to be defined in a future version of MATLAB
% handles    structure with handles and user data (see GUIDATA)
% varargin   command line arguments to face_gear (see VARARGIN)

% Choose default command line output for face_gear
handles.output = hObject;

% Update handles structure
guidata(hObject, handles);

% UIWAIT makes face_gear wait for user response (see UIRESUME)
% uiwait(handles.figure1);


% --- Outputs from this function are returned to the command line.
function varargout = face_gear_OutputFcn(hObject, eventdata, handles) 
% varargout  cell array for returning output args (see VARARGOUT);
% hObject    handle to figure
% eventdata  reserved - to be defined in a future version of MATLAB
% handles    structure with handles and user data (see GUIDATA)

% Get default command line output from handles structure
varargout{1} = handles.output;


% --- Executes during object creation, after setting all properties.
function figure1_CreateFcn(hObject, eventdata, handles)
% hObject    handle to figure1 (see GCBO)
% eventdata  reserved - to be defined in a future version of MATLAB
% handles    empty - handles not created until after all CreateFcns called
ha=axes('units','normalized','position',[0 0 1 1]);
uistack(ha,'down');
ii=imread('background.jpg');
%ÉèÖÃ³ÌÐòµÄ±³¾°Í¼Îªbackground.jpg
image(ii);
colormap gray
set(ha,'handlevisibility','off','visible','off');


function edit1_Callback(hObject, eventdata, handles)
% hObject    handle to edit1 (see GCBO)
% eventdata  reserved - to be defined in a future version of MATLAB
% handles    structure with handles and user data (see GUIDATA)

% Hints: get(hObject,'String') returns contents of edit1 as text
%        str2double(get(hObject,'String')) returns contents of edit1 as a double
%ÒÔ×Ö·û´®µÄÐÎÊ½À´´æ´¢Êý¾ÝÎÄ±¾¿ò1µÄÄÚÈÝ. Èç¹û×Ö·û´®²»ÊÇÊý×Ö£¬ÔòÏÖÊµ¿Õ°×ÄÚÈÝ
input=str2num(get(hObject,'String'));%¼ì²éÊäÈëÊÇ·ñÎª¿Õ. Èç¹ûÎª¿Õ,ÔòÄ¬ÈÏÏÔÊ¾Îª0
if (isempty(input))	
set(hObject,'String','0')
end
guidata(hObject,handles);%±£´æhandles½á¹¹Ìå£¬Ö»ÒªÔÚhandles½á¹¹ÌåÓÐ¸Ä±äÊ±£¬²ÅÐèÒª±£´æ %guidata(hObject, handles);%ÕâÀïÓÉÓÚhandlesÃ»ÓÐ¸Ä±ä£¬¹ÊÕâÀïÆäÊµÃ»ÓÐ±ØÒª£¬µ«ÊÇÎªÁË±ÜÃâÇ±ÔÚµÄ²»±ØÒªÂé·³£¬½¨ÒéÔÚËùÓÐCallback¶¼Ìí¼Ó¸ÃÃüÁî¡£


% --- Executes during object creation, after setting all properties.
function edit1_CreateFcn(hObject, eventdata, handles)
% hObject    handle to edit1 (see GCBO)
% eventdata  reserved - to be defined in a future version of MATLAB
% handles    empty - handles not created until after all CreateFcns called

% Hint: edit controls usually have a white background on Windows.
%       See ISPC and COMPUTER.
if ispc && isequal(get(hObject,'BackgroundColor'), get(0,'defaultUicontrolBackgroundColor'))
    set(hObject,'BackgroundColor','white');
end


function edit2_Callback(hObject, eventdata, handles)
% hObject    handle to edit2 (see GCBO)
% eventdata  reserved - to be defined in a future version of MATLAB
% handles    structure with handles and user data (see GUIDATA)

% Hints: get(hObject,'String') returns contents of edit2 as text
%        str2double(get(hObject,'String')) returns contents of edit2 as a double
%ÒÔ×Ö·û´®µÄÐÎÊ½À´´æ´¢Êý¾ÝÎÄ±¾¿ò1µÄÄÚÈÝ. Èç¹û×Ö·û´®²»ÊÇÊý×Ö£¬ÔòÏÖÊµ¿Õ°×ÄÚÈÝ
input=str2num(get(hObject,'String'));%¼ì²éÊäÈëÊÇ·ñÎª¿Õ. Èç¹ûÎª¿Õ,ÔòÄ¬ÈÏÏÔÊ¾Îª0
if (isempty(input))	
set(hObject,'String','0')
end
guidata(hObject,handles);%±£´æhandles½á¹¹Ìå£¬Ö»ÒªÔÚhandles½á¹¹ÌåÓÐ¸Ä±äÊ±£¬²ÅÐèÒª±£´æ %guidata(hObject, handles);%ÕâÀïÓÉÓÚhandlesÃ»ÓÐ¸Ä±ä£¬¹ÊÕâÀïÆäÊµÃ»ÓÐ±ØÒª£¬µ«ÊÇÎªÁË±ÜÃâÇ±ÔÚµÄ²»±ØÒªÂé·³£¬½¨ÒéÔÚËùÓÐCallback¶¼Ìí¼Ó¸ÃÃüÁî¡£


% --- Executes during object creation, after setting all properties.
function edit2_CreateFcn(hObject, eventdata, handles)
% hObject    handle to edit2 (see GCBO)
% eventdata  reserved - to be defined in a future version of MATLAB
% handles    empty - handles not created until after all CreateFcns called

% Hint: edit controls usually have a white background on Windows.
%       See ISPC and COMPUTER.
if ispc && isequal(get(hObject,'BackgroundColor'), get(0,'defaultUicontrolBackgroundColor'))
    set(hObject,'BackgroundColor','white');
end


function edit3_Callback(hObject, eventdata, handles)
% hObject    handle to edit3 (see GCBO)
% eventdata  reserved - to be defined in a future version of MATLAB
% handles    structure with handles and user data (see GUIDATA)

% Hints: get(hObject,'String') returns contents of edit3 as text
%        str2double(get(hObject,'String')) returns contents of edit3 as a double
%ÒÔ×Ö·û´®µÄÐÎÊ½À´´æ´¢Êý¾ÝÎÄ±¾¿ò1µÄÄÚÈÝ. Èç¹û×Ö·û´®²»ÊÇÊý×Ö£¬ÔòÏÖÊµ¿Õ°×ÄÚÈÝ
input=str2num(get(hObject,'String'));%¼ì²éÊäÈëÊÇ·ñÎª¿Õ. Èç¹ûÎª¿Õ,ÔòÄ¬ÈÏÏÔÊ¾Îª0
if (isempty(input))	
set(hObject,'String','0')
end
guidata(hObject,handles);%±£´æhandles½á¹¹Ìå£¬Ö»ÒªÔÚhandles½á¹¹ÌåÓÐ¸Ä±äÊ±£¬²ÅÐèÒª±£´æ %guidata(hObject, handles);%ÕâÀïÓÉÓÚhandlesÃ»ÓÐ¸Ä±ä£¬¹ÊÕâÀïÆäÊµÃ»ÓÐ±ØÒª£¬µ«ÊÇÎªÁË±ÜÃâÇ±ÔÚµÄ²»±ØÒªÂé·³£¬½¨ÒéÔÚËùÓÐCallback¶¼Ìí¼Ó¸ÃÃüÁî¡£


% --- Executes during object creation, after setting all properties.
function edit3_CreateFcn(hObject, eventdata, handles)
% hObject    handle to edit3 (see GCBO)
% eventdata  reserved - to be defined in a future version of MATLAB
% handles    empty - handles not created until after all CreateFcns called

% Hint: edit controls usually have a white background on Windows.
%       See ISPC and COMPUTER.
if ispc && isequal(get(hObject,'BackgroundColor'), get(0,'defaultUicontrolBackgroundColor'))
    set(hObject,'BackgroundColor','white');
end


function edit4_Callback(hObject, eventdata, handles)
% hObject    handle to edit4 (see GCBO)
% eventdata  reserved - to be defined in a future version of MATLAB
% handles    structure with handles and user data (see GUIDATA)

% Hints: get(hObject,'String') returns contents of edit4 as text
%        str2double(get(hObject,'String')) returns contents of edit4 as a double
%ÒÔ×Ö·û´®µÄÐÎÊ½À´´æ´¢Êý¾ÝÎÄ±¾¿ò1µÄÄÚÈÝ. Èç¹û×Ö·û´®²»ÊÇÊý×Ö£¬ÔòÏÖÊµ¿Õ°×ÄÚÈÝ
input=str2num(get(hObject,'String'));%¼ì²éÊäÈëÊÇ·ñÎª¿Õ. Èç¹ûÎª¿Õ,ÔòÄ¬ÈÏÏÔÊ¾Îª0
if (isempty(input))	
set(hObject,'String','0')
end
guidata(hObject,handles);%±£´æhandles½á¹¹Ìå£¬Ö»ÒªÔÚhandles½á¹¹ÌåÓÐ¸Ä±äÊ±£¬²ÅÐèÒª±£´æ %guidata(hObject, handles);%ÕâÀïÓÉÓÚhandlesÃ»ÓÐ¸Ä±ä£¬¹ÊÕâÀïÆäÊµÃ»ÓÐ±ØÒª£¬µ«ÊÇÎªÁË±ÜÃâÇ±ÔÚµÄ²»±ØÒªÂé·³£¬½¨ÒéÔÚËùÓÐCallback¶¼Ìí¼Ó¸ÃÃüÁî¡£


% --- Executes during object creation, after setting all properties.
function edit4_CreateFcn(hObject, eventdata, handles)
% hObject    handle to edit4 (see GCBO)
% eventdata  reserved - to be defined in a future version of MATLAB
% handles    empty - handles not created until after all CreateFcns called

% Hint: edit controls usually have a white background on Windows.
%       See ISPC and COMPUTER.
if ispc && isequal(get(hObject,'BackgroundColor'), get(0,'defaultUicontrolBackgroundColor'))
    set(hObject,'BackgroundColor','white');
end


function edit5_Callback(hObject, eventdata, handles)
% hObject    handle to edit5 (see GCBO)
% eventdata  reserved - to be defined in a future version of MATLAB
% handles    structure with handles and user data (see GUIDATA)

% Hints: get(hObject,'String') returns contents of edit5 as text
%        str2double(get(hObject,'String')) returns contents of edit5 as a double
%ÒÔ×Ö·û´®µÄÐÎÊ½À´´æ´¢Êý¾ÝÎÄ±¾¿ò1µÄÄÚÈÝ. Èç¹û×Ö·û´®²»ÊÇÊý×Ö£¬ÔòÏÖÊµ¿Õ°×ÄÚÈÝ
input=str2num(get(hObject,'String'));%¼ì²éÊäÈëÊÇ·ñÎª¿Õ. Èç¹ûÎª¿Õ,ÔòÄ¬ÈÏÏÔÊ¾Îª0
if (isempty(input))	
set(hObject,'String','0')
end
guidata(hObject,handles);%±£´æhandles½á¹¹Ìå£¬Ö»ÒªÔÚhandles½á¹¹ÌåÓÐ¸Ä±äÊ±£¬²ÅÐèÒª±£´æ %guidata(hObject, handles);%ÕâÀïÓÉÓÚhandlesÃ»ÓÐ¸Ä±ä£¬¹ÊÕâÀïÆäÊµÃ»ÓÐ±ØÒª£¬µ«ÊÇÎªÁË±ÜÃâÇ±ÔÚµÄ²»±ØÒªÂé·³£¬½¨ÒéÔÚËùÓÐCallback¶¼Ìí¼Ó¸ÃÃüÁî¡£


% --- Executes during object creation, after setting all properties.
function edit5_CreateFcn(hObject, eventdata, handles)
% hObject    handle to edit5 (see GCBO)
% eventdata  reserved - to be defined in a future version of MATLAB
% handles    empty - handles not created until after all CreateFcns called

% Hint: edit controls usually have a white background on Windows.
%       See ISPC and COMPUTER.
if ispc && isequal(get(hObject,'BackgroundColor'), get(0,'defaultUicontrolBackgroundColor'))
    set(hObject,'BackgroundColor','white');
end


function edit6_Callback(hObject, eventdata, handles)
% hObject    handle to edit6 (see GCBO)
% eventdata  reserved - to be defined in a future version of MATLAB
% handles    structure with handles and user data (see GUIDATA)

% Hints: get(hObject,'String') returns contents of edit6 as text
%        str2double(get(hObject,'String')) returns contents of edit6 as a double
%ÒÔ×Ö·û´®µÄÐÎÊ½À´´æ´¢Êý¾ÝÎÄ±¾¿ò1µÄÄÚÈÝ. Èç¹û×Ö·û´®²»ÊÇÊý×Ö£¬ÔòÏÖÊµ¿Õ°×ÄÚÈÝ
input=str2num(get(hObject,'String'));%¼ì²éÊäÈëÊÇ·ñÎª¿Õ. Èç¹ûÎª¿Õ,ÔòÄ¬ÈÏÏÔÊ¾Îª0
if (isempty(input))	
set(hObject,'String','0')
end
guidata(hObject,handles);%±£´æhandles½á¹¹Ìå£¬Ö»ÒªÔÚhandles½á¹¹ÌåÓÐ¸Ä±äÊ±£¬²ÅÐèÒª±£´æ %guidata(hObject, handles);%ÕâÀïÓÉÓÚhandlesÃ»ÓÐ¸Ä±ä£¬¹ÊÕâÀïÆäÊµÃ»ÓÐ±ØÒª£¬µ«ÊÇÎªÁË±ÜÃâÇ±ÔÚµÄ²»±ØÒªÂé·³£¬½¨ÒéÔÚËùÓÐCallback¶¼Ìí¼Ó¸ÃÃüÁî¡£


% --- Executes during object creation, after setting all properties.
function edit6_CreateFcn(hObject, eventdata, handles)
% hObject    handle to edit6 (see GCBO)
% eventdata  reserved - to be defined in a future version of MATLAB
% handles    empty - handles not created until after all CreateFcns called

% Hint: edit controls usually have a white background on Windows.
%       See ISPC and COMPUTER.
if ispc && isequal(get(hObject,'BackgroundColor'), get(0,'defaultUicontrolBackgroundColor'))
    set(hObject,'BackgroundColor','white');
end


function edit7_Callback(hObject, eventdata, handles)
% hObject    handle to edit7 (see GCBO)
% eventdata  reserved - to be defined in a future version of MATLAB
% handles    structure with handles and user data (see GUIDATA)

% Hints: get(hObject,'String') returns contents of edit7 as text
%        str2double(get(hObject,'String')) returns contents of edit7 as a double
%ÒÔ×Ö·û´®µÄÐÎÊ½À´´æ´¢Êý¾ÝÎÄ±¾¿ò1µÄÄÚÈÝ. Èç¹û×Ö·û´®²»ÊÇÊý×Ö£¬ÔòÏÖÊµ¿Õ°×ÄÚÈÝ
input=str2num(get(hObject,'String'));%¼ì²éÊäÈëÊÇ·ñÎª¿Õ. Èç¹ûÎª¿Õ,ÔòÄ¬ÈÏÏÔÊ¾Îª0
if (isempty(input))	
set(hObject,'String','0')
end
guidata(hObject,handles);%±£´æhandles½á¹¹Ìå£¬Ö»ÒªÔÚhandles½á¹¹ÌåÓÐ¸Ä±äÊ±£¬²ÅÐèÒª±£´æ %guidata(hObject, handles);%ÕâÀïÓÉÓÚhandlesÃ»ÓÐ¸Ä±ä£¬¹ÊÕâÀïÆäÊµÃ»ÓÐ±ØÒª£¬µ«ÊÇÎªÁË±ÜÃâÇ±ÔÚµÄ²»±ØÒªÂé·³£¬½¨ÒéÔÚËùÓÐCallback¶¼Ìí¼Ó¸ÃÃüÁî¡£


% --- Executes during object creation, after setting all properties.
function edit7_CreateFcn(hObject, eventdata, handles)
% hObject    handle to edit7 (see GCBO)
% eventdata  reserved - to be defined in a future version of MATLAB
% handles    empty - handles not created until after all CreateFcns called

% Hint: edit controls usually have a white background on Windows.
%       See ISPC and COMPUTER.
if ispc && isequal(get(hObject,'BackgroundColor'), get(0,'defaultUicontrolBackgroundColor'))
    set(hObject,'BackgroundColor','white');
end


function edit8_Callback(hObject, eventdata, handles)
% hObject    handle to edit8 (see GCBO)
% eventdata  reserved - to be defined in a future version of MATLAB
% handles    structure with handles and user data (see GUIDATA)

% Hints: get(hObject,'String') returns contents of edit8 as text
%        str2double(get(hObject,'String')) returns contents of edit8 as a double
%ÒÔ×Ö·û´®µÄÐÎÊ½À´´æ´¢Êý¾ÝÎÄ±¾¿ò1µÄÄÚÈÝ. Èç¹û×Ö·û´®²»ÊÇÊý×Ö£¬ÔòÏÖÊµ¿Õ°×ÄÚÈÝ
input=str2num(get(hObject,'String'));%¼ì²éÊäÈëÊÇ·ñÎª¿Õ. Èç¹ûÎª¿Õ,ÔòÄ¬ÈÏÏÔÊ¾Îª0
if (isempty(input))	
set(hObject,'String','0')
end
guidata(hObject,handles);%±£´æhandles½á¹¹Ìå£¬Ö»ÒªÔÚhandles½á¹¹ÌåÓÐ¸Ä±äÊ±£¬²ÅÐèÒª±£´æ %guidata(hObject, handles);%ÕâÀïÓÉÓÚhandlesÃ»ÓÐ¸Ä±ä£¬¹ÊÕâÀïÆäÊµÃ»ÓÐ±ØÒª£¬µ«ÊÇÎªÁË±ÜÃâÇ±ÔÚµÄ²»±ØÒªÂé·³£¬½¨ÒéÔÚËùÓÐCallback¶¼Ìí¼Ó¸ÃÃüÁî¡£


% --- Executes during object creation, after setting all properties.
function edit8_CreateFcn(hObject, eventdata, handles)
% hObject    handle to edit8 (see GCBO)
% eventdata  reserved - to be defined in a future version of MATLAB
% handles    empty - handles not created until after all CreateFcns called

% Hint: edit controls usually have a white background on Windows.
%       See ISPC and COMPUTER.
if ispc && isequal(get(hObject,'BackgroundColor'), get(0,'defaultUicontrolBackgroundColor'))
    set(hObject,'BackgroundColor','white');
end


function edit9_Callback(hObject, eventdata, handles)
% hObject    handle to edit9 (see GCBO)
% eventdata  reserved - to be defined in a future version of MATLAB
% handles    structure with handles and user data (see GUIDATA)

% Hints: get(hObject,'String') returns contents of edit9 as text
%        str2double(get(hObject,'String')) returns contents of edit9 as a double
%ÒÔ×Ö·û´®µÄÐÎÊ½À´´æ´¢Êý¾ÝÎÄ±¾¿ò1µÄÄÚÈÝ. Èç¹û×Ö·û´®²»ÊÇÊý×Ö£¬ÔòÏÖÊµ¿Õ°×ÄÚÈÝ
input=str2num(get(hObject,'String'));%¼ì²éÊäÈëÊÇ·ñÎª¿Õ. Èç¹ûÎª¿Õ,ÔòÄ¬ÈÏÏÔÊ¾Îª0
if (isempty(input))	
set(hObject,'String','0')
end
guidata(hObject,handles);%±£´æhandles½á¹¹Ìå£¬Ö»ÒªÔÚhandles½á¹¹ÌåÓÐ¸Ä±äÊ±£¬²ÅÐèÒª±£´æ %guidata(hObject, handles);%ÕâÀïÓÉÓÚhandlesÃ»ÓÐ¸Ä±ä£¬¹ÊÕâÀïÆäÊµÃ»ÓÐ±ØÒª£¬µ«ÊÇÎªÁË±ÜÃâÇ±ÔÚµÄ²»±ØÒªÂé·³£¬½¨ÒéÔÚËùÓÐCallback¶¼Ìí¼Ó¸ÃÃüÁî¡£


% --- Executes during object creation, after setting all properties.
function edit9_CreateFcn(hObject, eventdata, handles)
% hObject    handle to edit9 (see GCBO)
% eventdata  reserved - to be defined in a future version of MATLAB
% handles    empty - handles not created until after all CreateFcns called

% Hint: edit controls usually have a white background on Windows.
%       See ISPC and COMPUTER.
if ispc && isequal(get(hObject,'BackgroundColor'), get(0,'defaultUicontrolBackgroundColor'))
    set(hObject,'BackgroundColor','white');
end


function edit10_Callback(hObject, eventdata, handles)
% hObject    handle to edit10 (see GCBO)
% eventdata  reserved - to be defined in a future version of MATLAB
% handles    structure with handles and user data (see GUIDATA)

% Hints: get(hObject,'String') returns contents of edit10 as text
%        str2double(get(hObject,'String')) returns contents of edit10 as a double
%ÒÔ×Ö·û´®µÄÐÎÊ½À´´æ´¢Êý¾ÝÎÄ±¾¿ò1µÄÄÚÈÝ. Èç¹û×Ö·û´®²»ÊÇÊý×Ö£¬ÔòÏÖÊµ¿Õ°×ÄÚÈÝ
input=str2num(get(hObject,'String'));%¼ì²éÊäÈëÊÇ·ñÎª¿Õ. Èç¹ûÎª¿Õ,ÔòÄ¬ÈÏÏÔÊ¾Îª0
if (isempty(input))	
set(hObject,'String','0')
end
guidata(hObject,handles);%±£´æhandles½á¹¹Ìå£¬Ö»ÒªÔÚhandles½á¹¹ÌåÓÐ¸Ä±äÊ±£¬²ÅÐèÒª±£´æ %guidata(hObject, handles);%ÕâÀïÓÉÓÚhandlesÃ»ÓÐ¸Ä±ä£¬¹ÊÕâÀïÆäÊµÃ»ÓÐ±ØÒª£¬µ«ÊÇÎªÁË±ÜÃâÇ±ÔÚµÄ²»±ØÒªÂé·³£¬½¨ÒéÔÚËùÓÐCallback¶¼Ìí¼Ó¸ÃÃüÁî¡£
%Np = str2double(get(handles.edit1,'String'));
%Ng = str2double(get(handles.edit2,'String'));
%mn = str2double(get(handles.edit3,'String'));
%alpha = deg2rad(str2double(get(handles.edit4,'String')));%pay attention deg2rad(20)
%hax = str2double(get(handles.edit5,'String'));
%wp = str2double(get(handles.edit6,'String'));
%xp = str2double(get(handles.edit7,'String'));
%xg = str2double(get(handles.edit8,'String'));

%×¢Òâ ÒÔÏÂÊÇÇóµÈ±äÎ»³ÝÂÖ£¬¼´ xg + xp =0
%Çó´«¶¯±È
%mg = Ng / Np;
%wg = wp / mg;
%Çó·Ö¶ÈÔ²°ë¾¶r R
%r = mn * Np / 2;
%R = mn * Ng / 2;
%Çó»ùÔ²°ë¾¶
%rb = r * cos(alpha);
%Rb = R * cos(alpha);
%¶¨Òå³Ý¶¥¸ß²¢ÇÒÇó³Ý¶¥Ô²°ë¾¶
%hap = (hax + xp) * mn;
%hag = (hax + xg) * mn;
%ro = r + hap;
%Ro = R + hag;
%S1=0;
%½ÓÏÂÀ´ÇóÉäÁ÷Æ«ÖÃSÒÔ¼°ÈëÉä½ÇbetaµÄ·¶Î§
% 0<S<S0
%S0 = (hag * mg - hap)/(mg + 1) + (hag^2 - hap^2)/(2 * r * (mg + 1));
%m1=num2str(S1);
%m2=num2str(S0);
%set(handles.edit9,'String',m1)
%set(handles.edit10,'String',m2);%±£´æ½á¹¹Ìå£¬½«½á¹û¸³Öµ¸øedit14¿Õ¼äµÄstringÊôÐÔ£¬ÓÚÊÇ¾Í¿ÉÒÔÏÔÊ¾½á¹ûÁË


% --- Executes during object creation, after setting all properties.
function edit10_CreateFcn(hObject, eventdata, handles)
% hObject    handle to edit10 (see GCBO)
% eventdata  reserved - to be defined in a future version of MATLAB
% handles    empty - handles not created until after all CreateFcns called

% Hint: edit controls usually have a white background on Windows.
%       See ISPC and COMPUTER.
if ispc && isequal(get(hObject,'BackgroundColor'), get(0,'defaultUicontrolBackgroundColor'))
    set(hObject,'BackgroundColor','white');
end


function edit11_Callback(hObject, eventdata, handles)
% hObject    handle to edit11 (see GCBO)
% eventdata  reserved - to be defined in a future version of MATLAB
% handles    structure with handles and user data (see GUIDATA)

% Hints: get(hObject,'String') returns contents of edit11 as text
%        str2double(get(hObject,'String')) returns contents of edit11 as a double
%ÒÔ×Ö·û´®µÄÐÎÊ½À´´æ´¢Êý¾ÝÎÄ±¾¿ò1µÄÄÚÈÝ. Èç¹û×Ö·û´®²»ÊÇÊý×Ö£¬ÔòÏÖÊµ¿Õ°×ÄÚÈÝ
input=str2num(get(hObject,'String'));%¼ì²éÊäÈëÊÇ·ñÎª¿Õ. Èç¹ûÎª¿Õ,ÔòÄ¬ÈÏÏÔÊ¾Îª0
if (isempty(input))	
set(hObject,'String','0')
end
guidata(hObject,handles);%±£´æhandles½á¹¹Ìå£¬Ö»ÒªÔÚhandles½á¹¹ÌåÓÐ¸Ä±äÊ±£¬²ÅÐèÒª±£´æ %guidata(hObject, handles);%ÕâÀïÓÉÓÚhandlesÃ»ÓÐ¸Ä±ä£¬¹ÊÕâÀïÆäÊµÃ»ÓÐ±ØÒª£¬µ«ÊÇÎªÁË±ÜÃâÇ±ÔÚµÄ²»±ØÒªÂé·³£¬½¨ÒéÔÚËùÓÐCallback¶¼Ìí¼Ó¸ÃÃüÁî¡£


% --- Executes during object creation, after setting all properties.
function edit11_CreateFcn(hObject, eventdata, handles)
% hObject    handle to edit11 (see GCBO)
% eventdata  reserved - to be defined in a future version of MATLAB
% handles    empty - handles not created until after all CreateFcns called

% Hint: edit controls usually have a white background on Windows.
%       See ISPC and COMPUTER.
if ispc && isequal(get(hObject,'BackgroundColor'), get(0,'defaultUicontrolBackgroundColor'))
    set(hObject,'BackgroundColor','white');
end


function edit12_Callback(hObject, eventdata, handles)
% hObject    handle to edit12 (see GCBO)
% eventdata  reserved - to be defined in a future version of MATLAB
% handles    structure with handles and user data (see GUIDATA)

% Hints: get(hObject,'String') returns contents of edit12 as text
%        str2double(get(hObject,'String')) returns contents of edit12 as a double
%ÒÔ×Ö·û´®µÄÐÎÊ½À´´æ´¢Êý¾ÝÎÄ±¾¿ò1µÄÄÚÈÝ. Èç¹û×Ö·û´®²»ÊÇÊý×Ö£¬ÔòÏÖÊµ¿Õ°×ÄÚÈÝ
input=str2num(get(hObject,'String'));%¼ì²éÊäÈëÊÇ·ñÎª¿Õ. Èç¹ûÎª¿Õ,ÔòÄ¬ÈÏÏÔÊ¾Îª0
if (isempty(input))	
set(hObject,'String','0')
end
guidata(hObject,handles);%±£´æhandles½á¹¹Ìå£¬Ö»ÒªÔÚhandles½á¹¹ÌåÓÐ¸Ä±äÊ±£¬²ÅÐèÒª±£´æ %guidata(hObject, handles);%ÕâÀïÓÉÓÚhandlesÃ»ÓÐ¸Ä±ä£¬¹ÊÕâÀïÆäÊµÃ»ÓÐ±ØÒª£¬µ«ÊÇÎªÁË±ÜÃâÇ±ÔÚµÄ²»±ØÒªÂé·³£¬½¨ÒéÔÚËùÓÐCallback¶¼Ìí¼Ó¸ÃÃüÁî¡£


% --- Executes during object creation, after setting all properties.
function edit12_CreateFcn(hObject, eventdata, handles)
% hObject    handle to edit12 (see GCBO)
% eventdata  reserved - to be defined in a future version of MATLAB
% handles    empty - handles not created until after all CreateFcns called

% Hint: edit controls usually have a white background on Windows.
%       See ISPC and COMPUTER.
if ispc && isequal(get(hObject,'BackgroundColor'), get(0,'defaultUicontrolBackgroundColor'))
    set(hObject,'BackgroundColor','white');
end


function edit13_Callback(hObject, eventdata, handles)
% hObject    handle to edit13 (see GCBO)
% eventdata  reserved - to be defined in a future version of MATLAB
% handles    structure with handles and user data (see GUIDATA)

% Hints: get(hObject,'String') returns contents of edit13 as text
%        str2double(get(hObject,'String')) returns contents of edit13 as a double
%ÒÔ×Ö·û´®µÄÐÎÊ½À´´æ´¢Êý¾ÝÎÄ±¾¿ò1µÄÄÚÈÝ. Èç¹û×Ö·û´®²»ÊÇÊý×Ö£¬ÔòÏÖÊµ¿Õ°×ÄÚÈÝ
input=str2num(get(hObject,'String'));%¼ì²éÊäÈëÊÇ·ñÎª¿Õ. Èç¹ûÎª¿Õ,ÔòÄ¬ÈÏÏÔÊ¾Îª0
if (isempty(input))	
set(hObject,'String','0')
end
guidata(hObject,handles);%±£´æhandles½á¹¹Ìå£¬Ö»ÒªÔÚhandles½á¹¹ÌåÓÐ¸Ä±äÊ±£¬²ÅÐèÒª±£´æ %guidata(hObject, handles);%ÕâÀïÓÉÓÚhandlesÃ»ÓÐ¸Ä±ä£¬¹ÊÕâÀïÆäÊµÃ»ÓÐ±ØÒª£¬µ«ÊÇÎªÁË±ÜÃâÇ±ÔÚµÄ²»±ØÒªÂé·³£¬½¨ÒéÔÚËùÓÐCallback¶¼Ìí¼Ó¸ÃÃüÁî¡£


% --- Executes during object creation, after setting all properties.
function edit13_CreateFcn(hObject, eventdata, handles)
% hObject    handle to edit13 (see GCBO)
% eventdata  reserved - to be defined in a future version of MATLAB
% handles    empty - handles not created until after all CreateFcns called

% Hint: edit controls usually have a white background on Windows.
%       See ISPC and COMPUTER.
if ispc && isequal(get(hObject,'BackgroundColor'), get(0,'defaultUicontrolBackgroundColor'))
    set(hObject,'BackgroundColor','white');
end


% --- Executes on button press in pushbutton1.
function pushbutton1_Callback(hObject, eventdata, handles)
% hObject    handle to pushbutton1 (see GCBO)
% eventdata  reserved - to be defined in a future version of MATLAB
% handles    structure with handles and user data (see GUIDATA)
syms a;               
syms b;
syms c;
syms d;
syms e;
syms f;
syms m;
syms n;
syms z;
syms dp;
m1 = get(handles.edit1,'String');
m2 = get(handles.edit2,'String'); 
m3 = get(handles.edit3,'String');
m4 = get(handles.edit4,'String');
m5 = get(handles.edit5,'String');
m6 = get(handles.edit6,'String');
m7 = get(handles.edit7,'String');
m8 = get(handles.edit8,'String');
m9 = get(handles.edit9,'String');
m10 = get(handles.edit10,'String');
m11 = get(handles.edit11,'String');
m12 = get(handles.edit12,'String');
m13 = get(handles.edit13,'String');
% aÊÇ×Ö·û´®±äÁ¿£¬ÎÒÃÇÐèÒªÊ¹ÓÃstr2doubleº¯Êý½«Æä×ª»»ÎªÊýÖµ£¬È»ºó²ÅÄÜ¼ÆËã£¬·ñÔò×Ö·û´®ÊÇÃ»·¨¼ÆËãµÄ
n1 = str2double(m1);
n2 = str2double(m2);
n3 = str2double(m3);
n4 = str2double(m4);
n5 = str2double(m5);
n6 = str2double(m6);
n7 = str2double(m7);
n8 = str2double(m8);
n9 = str2double(m9);
n10 = str2double(m10);
n11 = str2double(m11);
n12 = str2double(m12);
n13 = str2double(m13);
% ¸ñÊ½×ª»»ÎªÊýÖµ
a = n7/sin(n5*pi/180)+(n6-n8)/cos(n5*pi/180);
b = (n4-n6-n7*cot(n5*pi/180))*cos(n5*pi/180);
c = n10/n1*atan((n7+(n6-n8)*tan(n5*pi/180))/n11)+tan(n9*pi/180)-n9*pi/180-n9*pi/180+pi/2;
d = (n4-n6)*sin(n5*pi/180)-n7*cos(n5*pi/180);

format long
k = 0;
er = 1;
x = [];
x(1) = 3;
fun(z)=a-n12/n13*(atan(z/d)+tan(acos(0.5*n1*n2*cos(n9*pi/180)/sqrt(z*z+d^2)))-acos(0.5*n1*n2*cos(n9*pi/180)/sqrt(z*z+d^2))-c)+b-z;
dfun(z)=diff(fun(z));

while er >0.00001
   x(2)=x(1)-fun(x(1))/dfun(x(1));
   er = abs(x(2)-x(1));
   x(1) = x(2);
   k = k+1;
end
x(1)
k
f=real(x(1))
dp = 0.5*n1*n2+n3*n2-sqrt(f*f+(n4*sin(n5*pi/180)-n6*sin(n5*pi/180)-n7*cos(n5*pi/180))^2)
e=num2str(dp); %×ª»¯Îª×Ö·û´®
set(handles.edit14,'String',e);%±£´æ½á¹¹Ìå£¬½«½á¹û¸³Öµ¸øedit14¿Õ¼äµÄstringÊôÐÔ£¬ÓÚÊÇ¾Í¿ÉÒÔÏÔÊ¾½á¹ûÁË
guidata(hObject,handles);%¸üÐÂ½á¹¹Ìå
%global Np Ng mn alpha xp xg hax wp;
%global Vj;
%global mg r R rb Rb hap hag ro Ro S0 S Rs Ri beta0 beta1 beta rs wg ri;
%S = str2double(get(handles.edit11,'String'));
%beta0<beta<beta1
%ÏÈÇóÖÐ¼ä±äÁ¿Ri£¨³å»÷µãµ½ÖÐÐÄÏß´¹Ö±¾àÀë£©ÒÔ¼°Rs
%×¢Òâ£¬´Ë´¦S²¢Ã»ÓÐ¸³Öµ£¬ÏÖÔÚÖ»ÖªµÀSµÄÈ¡Öµ·¶Î§¡£SÊÇÖ®ºó¸ù¾ÝÈ¡Öµ·¶Î§ÊäÈëµÄÖµ
%Rs = R + S;
%rs = r - S;
%Ri = (Ro^2 - Rs^2)^0.5;
%ri = (ro^2 - rs^2)^0.5;
%beta1 = atan((S+hap)/Ri);
%beta0 = atan((S-hag)/Ri);
%m1 = num2str(beta1);
%m0 = num2str(beta0);
%set(handles.edit12,'String',m1);
%set(handles.edit13,'String',m0);


function edit14_Callback(hObject, eventdata, handles)
% hObject    handle to edit14 (see GCBO)
% eventdata  reserved - to be defined in a future version of MATLAB
% handles    structure with handles and user data (see GUIDATA)

% Hints: get(hObject,'String') returns contents of edit14 as text
%        str2double(get(hObject,'String')) returns contents of edit14 as a double
%ÒÔ×Ö·û´®µÄÐÎÊ½À´´æ´¢Êý¾ÝÎÄ±¾¿ò1µÄÄÚÈÝ. Èç¹û×Ö·û´®²»ÊÇÊý×Ö£¬ÔòÏÖÊµ¿Õ°×ÄÚÈÝ
input=str2num(get(hObject,'String'));%¼ì²éÊäÈëÊÇ·ñÎª¿Õ. Èç¹ûÎª¿Õ,ÔòÄ¬ÈÏÏÔÊ¾Îª0
if (isempty(input))	
set(hObject,'String','0')
end
guidata(hObject,handles);%±£´æhandles½á¹¹Ìå£¬Ö»ÒªÔÚhandles½á¹¹ÌåÓÐ¸Ä±äÊ±£¬²ÅÐèÒª±£´æ %guidata(hObject, handles);%ÕâÀïÓÉÓÚhandlesÃ»ÓÐ¸Ä±ä£¬¹ÊÕâÀïÆäÊµÃ»ÓÐ±ØÒª£¬µ«ÊÇÎªÁË±ÜÃâÇ±ÔÚµÄ²»±ØÒªÂé·³£¬½¨ÒéÔÚËùÓÐCallback¶¼Ìí¼Ó¸ÃÃüÁî¡£


% --- Executes during object creation, after setting all properties.
function edit14_CreateFcn(hObject, eventdata, handles)
% hObject    handle to edit14 (see GCBO)
% eventdata  reserved - to be defined in a future version of MATLAB
% handles    empty - handles not created until after all CreateFcns called

% Hint: edit controls usually have a white background on Windows.
%       See ISPC and COMPUTER.
if ispc && isequal(get(hObject,'BackgroundColor'), get(0,'defaultUicontrolBackgroundColor'))
    set(hObject,'BackgroundColor','white');
end


function edit15_Callback(hObject, eventdata, handles)
% hObject    handle to edit15 (see GCBO)
% eventdata  reserved - to be defined in a future version of MATLAB
% handles    structure with handles and user data (see GUIDATA)

% Hints: get(hObject,'String') returns contents of edit15 as text
%        str2double(get(hObject,'String')) returns contents of edit15 as a double
input=str2num(get(hObject,'String'));%¼ì²éÊäÈëÊÇ·ñÎª¿Õ. Èç¹ûÎª¿Õ,ÔòÄ¬ÈÏÏÔÊ¾Îª0
if (isempty(input))	
set(hObject,'String','0')
end
guidata(hObject,handles);%±£´æhandles½á¹¹Ìå£¬Ö»ÒªÔÚhandles½á¹¹ÌåÓÐ¸Ä±äÊ±£¬²ÅÐèÒª±£´æ %guidata(hObject, handles);%ÕâÀïÓÉÓÚhandlesÃ»ÓÐ¸Ä±ä£¬¹ÊÕâÀïÆäÊµÃ»ÓÐ±ØÒª£¬µ«ÊÇÎªÁË±ÜÃâÇ±ÔÚµÄ²»±ØÒªÂé·³£¬½¨ÒéÔÚËùÓÐCallback¶¼Ìí¼Ó¸ÃÃüÁî¡£
%Np = str2double(get(handles.edit1,'String'));
%Ng = str2double(get(handles.edit2,'String'));
%mn = str2double(get(handles.edit3,'String'));
%alpha = deg2rad(str2double(get(handles.edit4,'String')));%pay attention deg2rad(20)
%hax = str2double(get(handles.edit5,'String'));
%wp = str2double(get(handles.edit6,'String'));
%xp = str2double(get(handles.edit7,'String'));
%xg = str2double(get(handles.edit8,'String'));

%×¢Òâ ÒÔÏÂÊÇÇóµÈ±äÎ»³ÝÂÖ£¬¼´ xg + xp =0
%Çó´«¶¯±È
%mg = Ng / Np;
%wg = wp / mg;
%Çó·Ö¶ÈÔ²°ë¾¶r R
%r = mn * Np / 2;
%R = mn * Ng / 2;
%Çó»ùÔ²°ë¾¶
%rb = r * cos(alpha);
%Rb = R * cos(alpha);
%¶¨Òå³Ý¶¥¸ß²¢ÇÒÇó³Ý¶¥Ô²°ë¾¶
%hap = (hax + xp) * mn;
%hag = (hax + xg) * mn;
%ro = r + hap;
%Ro = R + hag;
%S1=0;
%½ÓÏÂÀ´ÇóÉäÁ÷Æ«ÖÃSÒÔ¼°ÈëÉä½ÇbetaµÄ·¶Î§
% 0<S<S0
%S0 = (hag * mg - hap)/(mg + 1) + (hag^2 - hap^2)/(2 * r * (mg + 1));
%m1=num2str(S1);
%m2=num2str(S0);
%set(handles.edit9,'String',m1)
%set(handles.edit10,'String',m2);%±£´æ½á¹¹Ìå£¬½«½á¹û¸³Öµ¸øedit14¿Õ¼äµÄstringÊôÐÔ£¬ÓÚÊÇ¾Í¿ÉÒÔÏÔÊ¾½á¹ûÁË


% --- Executes during object creation, after setting all properties.
function edit15_CreateFcn(hObject, eventdata, handles)
% hObject    handle to edit15 (see GCBO)
% eventdata  reserved - to be defined in a future version of MATLAB
% handles    empty - handles not created until after all CreateFcns called

% Hint: edit controls usually have a white background on Windows.
%       See ISPC and COMPUTER.
if ispc && isequal(get(hObject,'BackgroundColor'), get(0,'defaultUicontrolBackgroundColor'))
    set(hObject,'BackgroundColor','white');
end


function edit16_Callback(hObject, eventdata, handles)
% hObject    handle to edit16 (see GCBO)
% eventdata  reserved - to be defined in a future version of MATLAB
% handles    structure with handles and user data (see GUIDATA)

% Hints: get(hObject,'String') returns contents of edit16 as text
%        str2double(get(hObject,'String')) returns contents of edit16 as a double
input=str2num(get(hObject,'String'));%¼ì²éÊäÈëÊÇ·ñÎª¿Õ. Èç¹ûÎª¿Õ,ÔòÄ¬ÈÏÏÔÊ¾Îª0
if (isempty(input))	
set(hObject,'String','0')
end
guidata(hObject,handles);%±£´æhandles½á¹¹Ìå£¬Ö»ÒªÔÚhandles½á¹¹ÌåÓÐ¸Ä±äÊ±£¬²ÅÐèÒª±£´æ %guidata(hObject, handles);%ÕâÀïÓÉÓÚhandlesÃ»ÓÐ¸Ä±ä£¬¹ÊÕâÀïÆäÊµÃ»ÓÐ±ØÒª£¬µ«ÊÇÎªÁË±ÜÃâÇ±ÔÚµÄ²»±ØÒªÂé·³£¬½¨ÒéÔÚËùÓÐCallback¶¼Ìí¼Ó¸ÃÃüÁî¡£
%Np = str2double(get(handles.edit1,'String'));
%Ng = str2double(get(handles.edit2,'String'));
%mn = str2double(get(handles.edit3,'String'));
%alpha = deg2rad(str2double(get(handles.edit4,'String')));%pay attention deg2rad(20)
%hax = str2double(get(handles.edit5,'String'));
%wp = str2double(get(handles.edit6,'String'));
%xp = str2double(get(handles.edit7,'String'));
%xg = str2double(get(handles.edit8,'String'));

%×¢Òâ ÒÔÏÂÊÇÇóµÈ±äÎ»³ÝÂÖ£¬¼´ xg + xp =0
%Çó´«¶¯±È
%mg = Ng / Np;
%wg = wp / mg;
%Çó·Ö¶ÈÔ²°ë¾¶r R
%r = mn * Np / 2;
%R = mn * Ng / 2;
%Çó»ùÔ²°ë¾¶
%rb = r * cos(alpha);
%Rb = R * cos(alpha);
%¶¨Òå³Ý¶¥¸ß²¢ÇÒÇó³Ý¶¥Ô²°ë¾¶
%hap = (hax + xp) * mn;
%hag = (hax + xg) * mn;
%ro = r + hap;
%Ro = R + hag;
%S1=0;
%½ÓÏÂÀ´ÇóÉäÁ÷Æ«ÖÃSÒÔ¼°ÈëÉä½ÇbetaµÄ·¶Î§
% 0<S<S0
%S0 = (hag * mg - hap)/(mg + 1) + (hag^2 - hap^2)/(2 * r * (mg + 1));
%m1=num2str(S1);
%m2=num2str(S0);
%set(handles.edit9,'String',m1)
%set(handles.edit10,'String',m2);%±£´æ½á¹¹Ìå£¬½«½á¹û¸³Öµ¸øedit14¿Õ¼äµÄstringÊôÐÔ£¬ÓÚÊÇ¾Í¿ÉÒÔÏÔÊ¾½á¹ûÁË


% --- Executes during object creation, after setting all properties.
function edit16_CreateFcn(hObject, eventdata, handles)
% hObject    handle to edit16 (see GCBO)
% eventdata  reserved - to be defined in a future version of MATLAB
% handles    empty - handles not created until after all CreateFcns called

% Hint: edit controls usually have a white background on Windows.
%       See ISPC and COMPUTER.
if ispc && isequal(get(hObject,'BackgroundColor'), get(0,'defaultUicontrolBackgroundColor'))
    set(hObject,'BackgroundColor','white');
end


function edit17_Callback(hObject, eventdata, handles)
% hObject    handle to edit17 (see GCBO)
% eventdata  reserved - to be defined in a future version of MATLAB
% handles    structure with handles and user data (see GUIDATA)

% Hints: get(hObject,'String') returns contents of edit17 as text
%        str2double(get(hObject,'String')) returns contents of edit17 as a double
input=str2num(get(hObject,'String'));%¼ì²éÊäÈëÊÇ·ñÎª¿Õ. Èç¹ûÎª¿Õ,ÔòÄ¬ÈÏÏÔÊ¾Îª0
if (isempty(input))	
set(hObject,'String','0')
end
guidata(hObject,handles);%±£´æhandles½á¹¹Ìå£¬Ö»ÒªÔÚhandles½á¹¹ÌåÓÐ¸Ä±äÊ±£¬²ÅÐèÒª±£´æ %guidata(hObject, handles);%ÕâÀïÓÉÓÚhandlesÃ»ÓÐ¸Ä±ä£¬¹ÊÕâÀïÆäÊµÃ»ÓÐ±ØÒª£¬µ«ÊÇÎªÁË±ÜÃâÇ±ÔÚµÄ²»±ØÒªÂé·³£¬½¨ÒéÔÚËùÓÐCallback¶¼Ìí¼Ó¸ÃÃüÁî¡£


% --- Executes during object creation, after setting all properties.
function edit17_CreateFcn(hObject, eventdata, handles)
% hObject    handle to edit17 (see GCBO)
% eventdata  reserved - to be defined in a future version of MATLAB
% handles    empty - handles not created until after all CreateFcns called

% Hint: edit controls usually have a white background on Windows.
%       See ISPC and COMPUTER.
if ispc && isequal(get(hObject,'BackgroundColor'), get(0,'defaultUicontrolBackgroundColor'))
    set(hObject,'BackgroundColor','white');
end


function edit18_Callback(hObject, eventdata, handles)
% hObject    handle to edit18 (see GCBO)
% eventdata  reserved - to be defined in a future version of MATLAB
% handles    structure with handles and user data (see GUIDATA)

% Hints: get(hObject,'String') returns contents of edit18 as text
%        str2double(get(hObject,'String')) returns contents of edit18 as a double
input=str2num(get(hObject,'String'));%¼ì²éÊäÈëÊÇ·ñÎª¿Õ. Èç¹ûÎª¿Õ,ÔòÄ¬ÈÏÏÔÊ¾Îª0
if (isempty(input))	
set(hObject,'String','0')
end
guidata(hObject,handles);%±£´æhandles½á¹¹Ìå£¬Ö»ÒªÔÚhandles½á¹¹ÌåÓÐ¸Ä±äÊ±£¬²ÅÐèÒª±£´æ %guidata(hObject, handles);%ÕâÀïÓÉÓÚhandlesÃ»ÓÐ¸Ä±ä£¬¹ÊÕâÀïÆäÊµÃ»ÓÐ±ØÒª£¬µ«ÊÇÎªÁË±ÜÃâÇ±ÔÚµÄ²»±ØÒªÂé·³£¬½¨ÒéÔÚËùÓÐCallback¶¼Ìí¼Ó¸ÃÃüÁî¡£
%Np = str2double(get(handles.edit1,'String'));
%Ng = str2double(get(handles.edit2,'String'));
%mn = str2double(get(handles.edit3,'String'));
%alpha = deg2rad(str2double(get(handles.edit4,'String')));%pay attention deg2rad(20)
%hax = str2double(get(handles.edit5,'String'));
%wp = str2double(get(handles.edit6,'String'));
%xp = str2double(get(handles.edit7,'String'));
%xg = str2double(get(handles.edit8,'String'));

%×¢Òâ ÒÔÏÂÊÇÇóµÈ±äÎ»³ÝÂÖ£¬¼´ xg + xp =0
%Çó´«¶¯±È
%mg = Ng / Np;
%wg = wp / mg;
%Çó·Ö¶ÈÔ²°ë¾¶r R
%r = mn * Np / 2;
%R = mn * Ng / 2;
%Çó»ùÔ²°ë¾¶
%rb = r * cos(alpha);
%Rb = R * cos(alpha);
%¶¨Òå³Ý¶¥¸ß²¢ÇÒÇó³Ý¶¥Ô²°ë¾¶
%hap = (hax + xp) * mn;
%hag = (hax + xg) * mn;
%ro = r + hap;
%Ro = R + hag;
%S1=0;
%½ÓÏÂÀ´ÇóÉäÁ÷Æ«ÖÃSÒÔ¼°ÈëÉä½ÇbetaµÄ·¶Î§
% 0<S<S0
%S0 = (hag * mg - hap)/(mg + 1) + (hag^2 - hap^2)/(2 * r * (mg + 1));
%m1=num2str(S1);
%m2=num2str(S0);
%set(handles.edit9,'String',m1)
%set(handles.edit10,'String',m2);%±£´æ½á¹¹Ìå£¬½«½á¹û¸³Öµ¸øedit14¿Õ¼äµÄstringÊôÐÔ£¬ÓÚÊÇ¾Í¿ÉÒÔÏÔÊ¾½á¹ûÁË


% --- Executes during object creation, after setting all properties.
function edit18_CreateFcn(hObject, eventdata, handles)
% hObject    handle to edit18 (see GCBO)
% eventdata  reserved - to be defined in a future version of MATLAB
% handles    empty - handles not created until after all CreateFcns called

% Hint: edit controls usually have a white background on Windows.
%       See ISPC and COMPUTER.
if ispc && isequal(get(hObject,'BackgroundColor'), get(0,'defaultUicontrolBackgroundColor'))
    set(hObject,'BackgroundColor','white');
end


function edit19_Callback(hObject, eventdata, handles)
% hObject    handle to edit19 (see GCBO)
% eventdata  reserved - to be defined in a future version of MATLAB
% handles    structure with handles and user data (see GUIDATA)

% Hints: get(hObject,'String') returns contents of edit19 as text
%        str2double(get(hObject,'String')) returns contents of edit19 as a double
input=str2num(get(hObject,'String'));%¼ì²éÊäÈëÊÇ·ñÎª¿Õ. Èç¹ûÎª¿Õ,ÔòÄ¬ÈÏÏÔÊ¾Îª0
if (isempty(input))	
set(hObject,'String','0')
end
guidata(hObject,handles);%±£´æhandles½á¹¹Ìå£¬Ö»ÒªÔÚhandles½á¹¹ÌåÓÐ¸Ä±äÊ±£¬²ÅÐèÒª±£´æ %guidata(hObject, handles);%ÕâÀïÓÉÓÚhandlesÃ»ÓÐ¸Ä±ä£¬¹ÊÕâÀïÆäÊµÃ»ÓÐ±ØÒª£¬µ«ÊÇÎªÁË±ÜÃâÇ±ÔÚµÄ²»±ØÒªÂé·³£¬½¨ÒéÔÚËùÓÐCallback¶¼Ìí¼Ó¸ÃÃüÁî¡£
%global Np Ng mn alpha xp xg hax wp;
%global Vj;
%global mg r R rb Rb hap hag ro Ro S0 S Rs Ri beta0 beta1 beta rs wg ri;
%ÊäÈëbetaµÄÈ¡Öµ
% beta = input('ÇëÊäÈëbetaµÄÖµ£¬·¶Î§ÔÚbeta0Óëbeta1Ö®¼ä\n');
%fun = @ myfun;
%X0=[1, 1];
%L = fsolve(fun,X0);
%Lp = L(1);
%Lg = L(2);
%dp = Np * mn / 2 + mn + xp - (((r - S + Ri * tan(beta)) * cos(beta))^2 + Lp^2)^0.5;
%dg = Ng * mn / 2 + mn + xg - (((R + S - ri * tan(beta)) * cos(beta))^2 + Lg^2)^0.5;
%set(handles.edit18,'String',num2str(dp));
%set(handles.edit19,'String',num2str(dg));


% --- Executes during object creation, after setting all properties.
function edit19_CreateFcn(hObject, eventdata, handles)
% hObject    handle to edit19 (see GCBO)
% eventdata  reserved - to be defined in a future version of MATLAB
% handles    empty - handles not created until after all CreateFcns called

% Hint: edit controls usually have a white background on Windows.
%       See ISPC and COMPUTER.
if ispc && isequal(get(hObject,'BackgroundColor'), get(0,'defaultUicontrolBackgroundColor'))
    set(hObject,'BackgroundColor','white');
end


function edit20_Callback(hObject, eventdata, handles)
% hObject    handle to edit20 (see GCBO)
% eventdata  reserved - to be defined in a future version of MATLAB
% handles    structure with handles and user data (see GUIDATA)

% Hints: get(hObject,'String') returns contents of edit20 as text
%        str2double(get(hObject,'String')) returns contents of edit20 as a double
input=str2num(get(hObject,'String'));%¼ì²éÊäÈëÊÇ·ñÎª¿Õ. Èç¹ûÎª¿Õ,ÔòÄ¬ÈÏÏÔÊ¾Îª0
if (isempty(input))	
set(hObject,'String','0')
end
guidata(hObject,handles);%±£´æhandles½á¹¹Ìå£¬Ö»ÒªÔÚhandles½á¹¹ÌåÓÐ¸Ä±äÊ±£¬²ÅÐèÒª±£´æ %guidata(hObject, handles);%ÕâÀïÓÉÓÚhandlesÃ»ÓÐ¸Ä±ä£¬¹ÊÕâÀïÆäÊµÃ»ÓÐ±ØÒª£¬µ«ÊÇÎªÁË±ÜÃâÇ±ÔÚµÄ²»±ØÒªÂé·³£¬½¨ÒéÔÚËùÓÐCallback¶¼Ìí¼Ó¸ÃÃüÁî¡£


% --- Executes during object creation, after setting all properties.
function edit20_CreateFcn(hObject, eventdata, handles)
% hObject    handle to edit20 (see GCBO)
% eventdata  reserved - to be defined in a future version of MATLAB
% handles    empty - handles not created until after all CreateFcns called

% Hint: edit controls usually have a white background on Windows.
%       See ISPC and COMPUTER.
if ispc && isequal(get(hObject,'BackgroundColor'), get(0,'defaultUicontrolBackgroundColor'))
    set(hObject,'BackgroundColor','white');
end


function edit21_Callback(hObject, eventdata, handles)
% hObject    handle to edit21 (see GCBO)
% eventdata  reserved - to be defined in a future version of MATLAB
% handles    structure with handles and user data (see GUIDATA)

% Hints: get(hObject,'String') returns contents of edit21 as text
%        str2double(get(hObject,'String')) returns contents of edit21 as a double
input=str2num(get(hObject,'String'));%¼ì²éÊäÈëÊÇ·ñÎª¿Õ. Èç¹ûÎª¿Õ,ÔòÄ¬ÈÏÏÔÊ¾Îª0
if (isempty(input))	
set(hObject,'String','0')
end
guidata(hObject,handles);%±£´æhandles½á¹¹Ìå£¬Ö»ÒªÔÚhandles½á¹¹ÌåÓÐ¸Ä±äÊ±£¬²ÅÐèÒª±£´æ %guidata(hObject, handles);%ÕâÀïÓÉÓÚhandlesÃ»ÓÐ¸Ä±ä£¬¹ÊÕâÀïÆäÊµÃ»ÓÐ±ØÒª£¬µ«ÊÇÎªÁË±ÜÃâÇ±ÔÚµÄ²»±ØÒªÂé·³£¬½¨ÒéÔÚËùÓÐCallback¶¼Ìí¼Ó¸ÃÃüÁî¡£
%Np = str2double(get(handles.edit1,'String'));
%Ng = str2double(get(handles.edit2,'String'));
%mn = str2double(get(handles.edit3,'String'));
%alpha = deg2rad(str2double(get(handles.edit4,'String')));%pay attention deg2rad(20)
%hax = str2double(get(handles.edit5,'String'));
%wp = str2double(get(handles.edit6,'String'));
%xp = str2double(get(handles.edit7,'String'));
%xg = str2double(get(handles.edit8,'String'));

%×¢Òâ ÒÔÏÂÊÇÇóµÈ±äÎ»³ÝÂÖ£¬¼´ xg + xp =0
%Çó´«¶¯±È
%mg = Ng / Np;
%wg = wp / mg;
%Çó·Ö¶ÈÔ²°ë¾¶r R
%r = mn * Np / 2;
%R = mn * Ng / 2;
%Çó»ùÔ²°ë¾¶
%rb = r * cos(alpha);
%Rb = R * cos(alpha);
%¶¨Òå³Ý¶¥¸ß²¢ÇÒÇó³Ý¶¥Ô²°ë¾¶
%hap = (hax + xp) * mn;
%hag = (hax + xg) * mn;
%ro = r + hap;
%Ro = R + hag;
%S1=0;
%½ÓÏÂÀ´ÇóÉäÁ÷Æ«ÖÃSÒÔ¼°ÈëÉä½ÇbetaµÄ·¶Î§
% 0<S<S0
%S0 = (hag * mg - hap)/(mg + 1) + (hag^2 - hap^2)/(2 * r * (mg + 1));
%m1=num2str(S1);
%m2=num2str(S0);
%set(handles.edit9,'String',m1)
%set(handles.edit10,'String',m2);%±£´æ½á¹¹Ìå£¬½«½á¹û¸³Öµ¸øedit14¿Õ¼äµÄstringÊôÐÔ£¬ÓÚÊÇ¾Í¿ÉÒÔÏÔÊ¾½á¹ûÁË


% --- Executes during object creation, after setting all properties.
function edit21_CreateFcn(hObject, eventdata, handles)
% hObject    handle to edit21 (see GCBO)
% eventdata  reserved - to be defined in a future version of MATLAB
% handles    empty - handles not created until after all CreateFcns called

% Hint: edit controls usually have a white background on Windows.
%       See ISPC and COMPUTER.
if ispc && isequal(get(hObject,'BackgroundColor'), get(0,'defaultUicontrolBackgroundColor'))
    set(hObject,'BackgroundColor','white');
end


function edit22_Callback(hObject, eventdata, handles)
% hObject    handle to edit22 (see GCBO)
% eventdata  reserved - to be defined in a future version of MATLAB
% handles    structure with handles and user data (see GUIDATA)

% Hints: get(hObject,'String') returns contents of edit22 as text
%        str2double(get(hObject,'String')) returns contents of edit22 as a double
input=str2num(get(hObject,'String'));%¼ì²éÊäÈëÊÇ·ñÎª¿Õ. Èç¹ûÎª¿Õ,ÔòÄ¬ÈÏÏÔÊ¾Îª0
if (isempty(input))	
set(hObject,'String','0')
end
guidata(hObject,handles);%±£´æhandles½á¹¹Ìå£¬Ö»ÒªÔÚhandles½á¹¹ÌåÓÐ¸Ä±äÊ±£¬²ÅÐèÒª±£´æ %guidata(hObject, handles);%ÕâÀïÓÉÓÚhandlesÃ»ÓÐ¸Ä±ä£¬¹ÊÕâÀïÆäÊµÃ»ÓÐ±ØÒª£¬µ«ÊÇÎªÁË±ÜÃâÇ±ÔÚµÄ²»±ØÒªÂé·³£¬½¨ÒéÔÚËùÓÐCallback¶¼Ìí¼Ó¸ÃÃüÁî¡£


% --- Executes during object creation, after setting all properties.
function edit22_CreateFcn(hObject, eventdata, handles)
% hObject    handle to edit22 (see GCBO)
% eventdata  reserved - to be defined in a future version of MATLAB
% handles    empty - handles not created until after all CreateFcns called

% Hint: edit controls usually have a white background on Windows.
%       See ISPC and COMPUTER.
if ispc && isequal(get(hObject,'BackgroundColor'), get(0,'defaultUicontrolBackgroundColor'))
    set(hObject,'BackgroundColor','white');
end


function edit23_Callback(hObject, eventdata, handles)
% hObject    handle to edit23 (see GCBO)
% eventdata  reserved - to be defined in a future version of MATLAB
% handles    structure with handles and user data (see GUIDATA)

% Hints: get(hObject,'String') returns contents of edit23 as text
%        str2double(get(hObject,'String')) returns contents of edit23 as a double
input=str2num(get(hObject,'String'));%¼ì²éÊäÈëÊÇ·ñÎª¿Õ. Èç¹ûÎª¿Õ,ÔòÄ¬ÈÏÏÔÊ¾Îª0
if (isempty(input))	
set(hObject,'String','0')
end
guidata(hObject,handles);%±£´æhandles½á¹¹Ìå£¬Ö»ÒªÔÚhandles½á¹¹ÌåÓÐ¸Ä±äÊ±£¬²ÅÐèÒª±£´æ %guidata(hObject, handles);%ÕâÀïÓÉÓÚhandlesÃ»ÓÐ¸Ä±ä£¬¹ÊÕâÀïÆäÊµÃ»ÓÐ±ØÒª£¬µ«ÊÇÎªÁË±ÜÃâÇ±ÔÚµÄ²»±ØÒªÂé·³£¬½¨ÒéÔÚËùÓÐCallback¶¼Ìí¼Ó¸ÃÃüÁî¡£


% --- Executes during object creation, after setting all properties.
function edit23_CreateFcn(hObject, eventdata, handles)
% hObject    handle to edit23 (see GCBO)
% eventdata  reserved - to be defined in a future version of MATLAB
% handles    empty - handles not created until after all CreateFcns called

% Hint: edit controls usually have a white background on Windows.
%       See ISPC and COMPUTER.
if ispc && isequal(get(hObject,'BackgroundColor'), get(0,'defaultUicontrolBackgroundColor'))
    set(hObject,'BackgroundColor','white');
end


function edit24_Callback(hObject, eventdata, handles)
% hObject    handle to edit24 (see GCBO)
% eventdata  reserved - to be defined in a future version of MATLAB
% handles    structure with handles and user data (see GUIDATA)

% Hints: get(hObject,'String') returns contents of edit24 as text
%        str2double(get(hObject,'String')) returns contents of edit24 as a double
input=str2num(get(hObject,'String'));%¼ì²éÊäÈëÊÇ·ñÎª¿Õ. Èç¹ûÎª¿Õ,ÔòÄ¬ÈÏÏÔÊ¾Îª0
if (isempty(input))	
set(hObject,'String','0')
end
guidata(hObject,handles);%±£´æhandles½á¹¹Ìå£¬Ö»ÒªÔÚhandles½á¹¹ÌåÓÐ¸Ä±äÊ±£¬²ÅÐèÒª±£´æ %guidata(hObject, handles);%ÕâÀïÓÉÓÚhandlesÃ»ÓÐ¸Ä±ä£¬¹ÊÕâÀïÆäÊµÃ»ÓÐ±ØÒª£¬µ«ÊÇÎªÁË±ÜÃâÇ±ÔÚµÄ²»±ØÒªÂé·³£¬½¨ÒéÔÚËùÓÐCallback¶¼Ìí¼Ó¸ÃÃüÁî¡£


% --- Executes during object creation, after setting all properties.
function edit24_CreateFcn(hObject, eventdata, handles)
% hObject    handle to edit24 (see GCBO)
% eventdata  reserved - to be defined in a future version of MATLAB
% handles    empty - handles not created until after all CreateFcns called

% Hint: edit controls usually have a white background on Windows.
%       See ISPC and COMPUTER.
if ispc && isequal(get(hObject,'BackgroundColor'), get(0,'defaultUicontrolBackgroundColor'))
    set(hObject,'BackgroundColor','white');
end


function edit25_Callback(hObject, eventdata, handles)
% hObject    handle to edit25 (see GCBO)
% eventdata  reserved - to be defined in a future version of MATLAB
% handles    structure with handles and user data (see GUIDATA)

% Hints: get(hObject,'String') returns contents of edit25 as text
%        str2double(get(hObject,'String')) returns contents of edit25 as a double
input=str2num(get(hObject,'String'));%¼ì²éÊäÈëÊÇ·ñÎª¿Õ. Èç¹ûÎª¿Õ,ÔòÄ¬ÈÏÏÔÊ¾Îª0
if (isempty(input))	
set(hObject,'String','0')
end
guidata(hObject,handles);%±£´æhandles½á¹¹Ìå£¬Ö»ÒªÔÚhandles½á¹¹ÌåÓÐ¸Ä±äÊ±£¬²ÅÐèÒª±£´æ %guidata(hObject, handles);%ÕâÀïÓÉÓÚhandlesÃ»ÓÐ¸Ä±ä£¬¹ÊÕâÀïÆäÊµÃ»ÓÐ±ØÒª£¬µ«ÊÇÎªÁË±ÜÃâÇ±ÔÚµÄ²»±ØÒªÂé·³£¬½¨ÒéÔÚËùÓÐCallback¶¼Ìí¼Ó¸ÃÃüÁî¡£


% --- Executes during object creation, after setting all properties.
function edit25_CreateFcn(hObject, eventdata, handles)
% hObject    handle to edit25 (see GCBO)
% eventdata  reserved - to be defined in a future version of MATLAB
% handles    empty - handles not created until after all CreateFcns called

% Hint: edit controls usually have a white background on Windows.
%       See ISPC and COMPUTER.
if ispc && isequal(get(hObject,'BackgroundColor'), get(0,'defaultUicontrolBackgroundColor'))
    set(hObject,'BackgroundColor','white');
end


function edit26_Callback(hObject, eventdata, handles)
% hObject    handle to edit26 (see GCBO)
% eventdata  reserved - to be defined in a future version of MATLAB
% handles    structure with handles and user data (see GUIDATA)

% Hints: get(hObject,'String') returns contents of edit26 as text
%        str2double(get(hObject,'String')) returns contents of edit26 as a double
input=str2num(get(hObject,'String'));%¼ì²éÊäÈëÊÇ·ñÎª¿Õ. Èç¹ûÎª¿Õ,ÔòÄ¬ÈÏÏÔÊ¾Îª0
if (isempty(input))	
set(hObject,'String','0')
end
guidata(hObject,handles);%±£´æhandles½á¹¹Ìå£¬Ö»ÒªÔÚhandles½á¹¹ÌåÓÐ¸Ä±äÊ±£¬²ÅÐèÒª±£´æ %guidata(hObject, handles);%ÕâÀïÓÉÓÚhandlesÃ»ÓÐ¸Ä±ä£¬¹ÊÕâÀïÆäÊµÃ»ÓÐ±ØÒª£¬µ«ÊÇÎªÁË±ÜÃâÇ±ÔÚµÄ²»±ØÒªÂé·³£¬½¨ÒéÔÚËùÓÐCallback¶¼Ìí¼Ó¸ÃÃüÁî¡£


% --- Executes during object creation, after setting all properties.
function edit26_CreateFcn(hObject, eventdata, handles)
% hObject    handle to edit26 (see GCBO)
% eventdata  reserved - to be defined in a future version of MATLAB
% handles    empty - handles not created until after all CreateFcns called

% Hint: edit controls usually have a white background on Windows.
%       See ISPC and COMPUTER.
if ispc && isequal(get(hObject,'BackgroundColor'), get(0,'defaultUicontrolBackgroundColor'))
    set(hObject,'BackgroundColor','white');
end


function edit27_Callback(hObject, eventdata, handles)
% hObject    handle to edit27 (see GCBO)
% eventdata  reserved - to be defined in a future version of MATLAB
% handles    structure with handles and user data (see GUIDATA)

% Hints: get(hObject,'String') returns contents of edit27 as text
%        str2double(get(hObject,'String')) returns contents of edit27 as a double
input=str2num(get(hObject,'String'));%¼ì²éÊäÈëÊÇ·ñÎª¿Õ. Èç¹ûÎª¿Õ,ÔòÄ¬ÈÏÏÔÊ¾Îª0
if (isempty(input))	
set(hObject,'String','0')
end
guidata(hObject,handles);%±£´æhandles½á¹¹Ìå£¬Ö»ÒªÔÚhandles½á¹¹ÌåÓÐ¸Ä±äÊ±£¬²ÅÐèÒª±£´æ %guidata(hObject, handles);%ÕâÀïÓÉÓÚhandlesÃ»ÓÐ¸Ä±ä£¬¹ÊÕâÀïÆäÊµÃ»ÓÐ±ØÒª£¬µ«ÊÇÎªÁË±ÜÃâÇ±ÔÚµÄ²»±ØÒªÂé·³£¬½¨ÒéÔÚËùÓÐCallback¶¼Ìí¼Ó¸ÃÃüÁî¡£


% --- Executes during object creation, after setting all properties.
function edit27_CreateFcn(hObject, eventdata, handles)
% hObject    handle to edit27 (see GCBO)
% eventdata  reserved - to be defined in a future version of MATLAB
% handles    empty - handles not created until after all CreateFcns called

% Hint: edit controls usually have a white background on Windows.
%       See ISPC and COMPUTER.
if ispc && isequal(get(hObject,'BackgroundColor'), get(0,'defaultUicontrolBackgroundColor'))
    set(hObject,'BackgroundColor','white');
end


function edit28_Callback(hObject, eventdata, handles)
% hObject    handle to edit28 (see GCBO)
% eventdata  reserved - to be defined in a future version of MATLAB
% handles    structure with handles and user data (see GUIDATA)

% Hints: get(hObject,'String') returns contents of edit28 as text
%        str2double(get(hObject,'String')) returns contents of edit28 as a double
input=str2num(get(hObject,'String'));%¼ì²éÊäÈëÊÇ·ñÎª¿Õ. Èç¹ûÎª¿Õ,ÔòÄ¬ÈÏÏÔÊ¾Îª0
if (isempty(input))	
set(hObject,'String','0')
end
guidata(hObject,handles);%±£´æhandles½á¹¹Ìå£¬Ö»ÒªÔÚhandles½á¹¹ÌåÓÐ¸Ä±äÊ±£¬²ÅÐèÒª±£´æ %guidata(hObject, handles);%ÕâÀïÓÉÓÚhandlesÃ»ÓÐ¸Ä±ä£¬¹ÊÕâÀïÆäÊµÃ»ÓÐ±ØÒª£¬µ«ÊÇÎªÁË±ÜÃâÇ±ÔÚµÄ²»±ØÒªÂé·³£¬½¨ÒéÔÚËùÓÐCallback¶¼Ìí¼Ó¸ÃÃüÁî¡£


% --- Executes during object creation, after setting all properties.
function edit28_CreateFcn(hObject, eventdata, handles)
% hObject    handle to edit28 (see GCBO)
% eventdata  reserved - to be defined in a future version of MATLAB
% handles    empty - handles not created until after all CreateFcns called

% Hint: edit controls usually have a white background on Windows.
%       See ISPC and COMPUTER.
if ispc && isequal(get(hObject,'BackgroundColor'), get(0,'defaultUicontrolBackgroundColor'))
    set(hObject,'BackgroundColor','white');
end


function edit29_Callback(hObject, eventdata, handles)
% hObject    handle to edit29 (see GCBO)
% eventdata  reserved - to be defined in a future version of MATLAB
% handles    structure with handles and user data (see GUIDATA)

% Hints: get(hObject,'String') returns contents of edit29 as text
%        str2double(get(hObject,'String')) returns contents of edit29 as a double
input=str2num(get(hObject,'String'));%¼ì²éÊäÈëÊÇ·ñÎª¿Õ. Èç¹ûÎª¿Õ,ÔòÄ¬ÈÏÏÔÊ¾Îª0
if (isempty(input))	
set(hObject,'String','0')
end
guidata(hObject,handles);%±£´æhandles½á¹¹Ìå£¬Ö»ÒªÔÚhandles½á¹¹ÌåÓÐ¸Ä±äÊ±£¬²ÅÐèÒª±£´æ %guidata(hObject, handles);%ÕâÀïÓÉÓÚhandlesÃ»ÓÐ¸Ä±ä£¬¹ÊÕâÀïÆäÊµÃ»ÓÐ±ØÒª£¬µ«ÊÇÎªÁË±ÜÃâÇ±ÔÚµÄ²»±ØÒªÂé·³£¬½¨ÒéÔÚËùÓÐCallback¶¼Ìí¼Ó¸ÃÃüÁî¡£


% --- Executes during object creation, after setting all properties.
function edit29_CreateFcn(hObject, eventdata, handles)
% hObject    handle to edit29 (see GCBO)
% eventdata  reserved - to be defined in a future version of MATLAB
% handles    empty - handles not created until after all CreateFcns called

% Hint: edit controls usually have a white background on Windows.
%       See ISPC and COMPUTER.
if ispc && isequal(get(hObject,'BackgroundColor'), get(0,'defaultUicontrolBackgroundColor'))
    set(hObject,'BackgroundColor','white');
end


function edit30_Callback(hObject, eventdata, handles)
% hObject    handle to edit30 (see GCBO)
% eventdata  reserved - to be defined in a future version of MATLAB
% handles    structure with handles and user data (see GUIDATA)

% Hints: get(hObject,'String') returns contents of edit30 as text
%        str2double(get(hObject,'String')) returns contents of edit30 as a double
input=str2num(get(hObject,'String'));%¼ì²éÊäÈëÊÇ·ñÎª¿Õ. Èç¹ûÎª¿Õ,ÔòÄ¬ÈÏÏÔÊ¾Îª0
if (isempty(input))	
set(hObject,'String','0')
end
guidata(hObject,handles);%±£´æhandles½á¹¹Ìå£¬Ö»ÒªÔÚhandles½á¹¹ÌåÓÐ¸Ä±äÊ±£¬²ÅÐèÒª±£´æ %guidata(hObject, handles);%ÕâÀïÓÉÓÚhandlesÃ»ÓÐ¸Ä±ä£¬¹ÊÕâÀïÆäÊµÃ»ÓÐ±ØÒª£¬µ«ÊÇÎªÁË±ÜÃâÇ±ÔÚµÄ²»±ØÒªÂé·³£¬½¨ÒéÔÚËùÓÐCallback¶¼Ìí¼Ó¸ÃÃüÁî¡£


% --- Executes during object creation, after setting all properties.
function edit30_CreateFcn(hObject, eventdata, handles)
% hObject    handle to edit30 (see GCBO)
% eventdata  reserved - to be defined in a future version of MATLAB
% handles    empty - handles not created until after all CreateFcns called

% Hint: edit controls usually have a white background on Windows.
%       See ISPC and COMPUTER.
if ispc && isequal(get(hObject,'BackgroundColor'), get(0,'defaultUicontrolBackgroundColor'))
    set(hObject,'BackgroundColor','white');
end


function edit31_Callback(hObject, eventdata, handles)
% hObject    handle to edit31 (see GCBO)
% eventdata  reserved - to be defined in a future version of MATLAB
% handles    structure with handles and user data (see GUIDATA)

% Hints: get(hObject,'String') returns contents of edit31 as text
%        str2double(get(hObject,'String')) returns contents of edit31 as a double
input=str2num(get(hObject,'String'));%¼ì²éÊäÈëÊÇ·ñÎª¿Õ. Èç¹ûÎª¿Õ,ÔòÄ¬ÈÏÏÔÊ¾Îª0
if (isempty(input))	
set(hObject,'String','0')
end
guidata(hObject,handles);%±£´æhandles½á¹¹Ìå£¬Ö»ÒªÔÚhandles½á¹¹ÌåÓÐ¸Ä±äÊ±£¬²ÅÐèÒª±£´æ %guidata(hObject, handles);%ÕâÀïÓÉÓÚhandlesÃ»ÓÐ¸Ä±ä£¬¹ÊÕâÀïÆäÊµÃ»ÓÐ±ØÒª£¬µ«ÊÇÎªÁË±ÜÃâÇ±ÔÚµÄ²»±ØÒªÂé·³£¬½¨ÒéÔÚËùÓÐCallback¶¼Ìí¼Ó¸ÃÃüÁî¡£


% --- Executes during object creation, after setting all properties.
function edit31_CreateFcn(hObject, eventdata, handles)
% hObject    handle to edit31 (see GCBO)
% eventdata  reserved - to be defined in a future version of MATLAB
% handles    empty - handles not created until after all CreateFcns called

% Hint: edit controls usually have a white background on Windows.
%       See ISPC and COMPUTER.
if ispc && isequal(get(hObject,'BackgroundColor'), get(0,'defaultUicontrolBackgroundColor'))
    set(hObject,'BackgroundColor','white');
end


function edit32_Callback(hObject, eventdata, handles)
% hObject    handle to edit32 (see GCBO)
% eventdata  reserved - to be defined in a future version of MATLAB
% handles    structure with handles and user data (see GUIDATA)

% Hints: get(hObject,'String') returns contents of edit32 as text
%        str2double(get(hObject,'String')) returns contents of edit32 as a double
input=str2num(get(hObject,'String'));%¼ì²éÊäÈëÊÇ·ñÎª¿Õ. Èç¹ûÎª¿Õ,ÔòÄ¬ÈÏÏÔÊ¾Îª0
if (isempty(input))	
set(hObject,'String','0')
end
guidata(hObject,handles);%±£´æhandles½á¹¹Ìå£¬Ö»ÒªÔÚhandles½á¹¹ÌåÓÐ¸Ä±äÊ±£¬²ÅÐèÒª±£´æ %guidata(hObject, handles);%ÕâÀïÓÉÓÚhandlesÃ»ÓÐ¸Ä±ä£¬¹ÊÕâÀïÆäÊµÃ»ÓÐ±ØÒª£¬µ«ÊÇÎªÁË±ÜÃâÇ±ÔÚµÄ²»±ØÒªÂé·³£¬½¨ÒéÔÚËùÓÐCallback¶¼Ìí¼Ó¸ÃÃüÁî¡£
%Np = str2double(get(handles.edit1,'String'));
%Ng = str2double(get(handles.edit2,'String'));
%mn = str2double(get(handles.edit3,'String'));
%alpha = deg2rad(str2double(get(handles.edit4,'String')));%pay attention deg2rad(20)
%hax = str2double(get(handles.edit5,'String'));
%wp = str2double(get(handles.edit6,'String'));
%xp = str2double(get(handles.edit7,'String'));
%xg = str2double(get(handles.edit8,'String'));

%×¢Òâ ÒÔÏÂÊÇÇóµÈ±äÎ»³ÝÂÖ£¬¼´ xg + xp =0
%Çó´«¶¯±È
%mg = Ng / Np;
%wg = wp / mg;
%Çó·Ö¶ÈÔ²°ë¾¶r R
%r = mn * Np / 2;
%R = mn * Ng / 2;
%Çó»ùÔ²°ë¾¶
%rb = r * cos(alpha);
%Rb = R * cos(alpha);
%¶¨Òå³Ý¶¥¸ß²¢ÇÒÇó³Ý¶¥Ô²°ë¾¶
%hap = (hax + xp) * mn;
%hag = (hax + xg) * mn;
%ro = r + hap;
%Ro = R + hag;
%S1=0;
%½ÓÏÂÀ´ÇóÉäÁ÷Æ«ÖÃSÒÔ¼°ÈëÉä½ÇbetaµÄ·¶Î§
% 0<S<S0
%S0 = (hag * mg - hap)/(mg + 1) + (hag^2 - hap^2)/(2 * r * (mg + 1));
%m1=num2str(S1);
%m2=num2str(S0);
%set(handles.edit9,'String',m1)
%set(handles.edit10,'String',m2);%±£´æ½á¹¹Ìå£¬½«½á¹û¸³Öµ¸øedit14¿Õ¼äµÄstringÊôÐÔ£¬ÓÚÊÇ¾Í¿ÉÒÔÏÔÊ¾½á¹ûÁË


% --- Executes during object creation, after setting all properties.
function edit32_CreateFcn(hObject, eventdata, handles)
% hObject    handle to edit32 (see GCBO)
% eventdata  reserved - to be defined in a future version of MATLAB
% handles    empty - handles not created until after all CreateFcns called

% Hint: edit controls usually have a white background on Windows.
%       See ISPC and COMPUTER.
if ispc && isequal(get(hObject,'BackgroundColor'), get(0,'defaultUicontrolBackgroundColor'))
    set(hObject,'BackgroundColor','white');
end


function edit33_Callback(hObject, eventdata, handles)
% hObject    handle to edit33 (see GCBO)
% eventdata  reserved - to be defined in a future version of MATLAB
% handles    structure with handles and user data (see GUIDATA)

% Hints: get(hObject,'String') returns contents of edit33 as text
%        str2double(get(hObject,'String')) returns contents of edit33 as a double
input=str2num(get(hObject,'String'));%¼ì²éÊäÈëÊÇ·ñÎª¿Õ. Èç¹ûÎª¿Õ,ÔòÄ¬ÈÏÏÔÊ¾Îª0
if (isempty(input))	
set(hObject,'String','0')
end
guidata(hObject,handles);%±£´æhandles½á¹¹Ìå£¬Ö»ÒªÔÚhandles½á¹¹ÌåÓÐ¸Ä±äÊ±£¬²ÅÐèÒª±£´æ %guidata(hObject, handles);%ÕâÀïÓÉÓÚhandlesÃ»ÓÐ¸Ä±ä£¬¹ÊÕâÀïÆäÊµÃ»ÓÐ±ØÒª£¬µ«ÊÇÎªÁË±ÜÃâÇ±ÔÚµÄ²»±ØÒªÂé·³£¬½¨ÒéÔÚËùÓÐCallback¶¼Ìí¼Ó¸ÃÃüÁî¡£


% --- Executes during object creation, after setting all properties.
function edit33_CreateFcn(hObject, eventdata, handles)
% hObject    handle to edit33 (see GCBO)
% eventdata  reserved - to be defined in a future version of MATLAB
% handles    empty - handles not created until after all CreateFcns called

% Hint: edit controls usually have a white background on Windows.
%       See ISPC and COMPUTER.
if ispc && isequal(get(hObject,'BackgroundColor'), get(0,'defaultUicontrolBackgroundColor'))
    set(hObject,'BackgroundColor','white');
end


function edit34_Callback(hObject, eventdata, handles)
% hObject    handle to edit34 (see GCBO)
% eventdata  reserved - to be defined in a future version of MATLAB
% handles    structure with handles and user data (see GUIDATA)

% Hints: get(hObject,'String') returns contents of edit34 as text
%        str2double(get(hObject,'String')) returns contents of edit34 as a double
input=str2num(get(hObject,'String'));%¼ì²éÊäÈëÊÇ·ñÎª¿Õ. Èç¹ûÎª¿Õ,ÔòÄ¬ÈÏÏÔÊ¾Îª0
if (isempty(input))	
set(hObject,'String','0')
end
guidata(hObject,handles);%±£´æhandles½á¹¹Ìå£¬Ö»ÒªÔÚhandles½á¹¹ÌåÓÐ¸Ä±äÊ±£¬²ÅÐèÒª±£´æ %guidata(hObject, handles);%ÕâÀïÓÉÓÚhandlesÃ»ÓÐ¸Ä±ä£¬¹ÊÕâÀïÆäÊµÃ»ÓÐ±ØÒª£¬µ«ÊÇÎªÁË±ÜÃâÇ±ÔÚµÄ²»±ØÒªÂé·³£¬½¨ÒéÔÚËùÓÐCallback¶¼Ìí¼Ó¸ÃÃüÁî¡£


% --- Executes during object creation, after setting all properties.
function edit34_CreateFcn(hObject, eventdata, handles)
% hObject    handle to edit34 (see GCBO)
% eventdata  reserved - to be defined in a future version of MATLAB
% handles    empty - handles not created until after all CreateFcns called

% Hint: edit controls usually have a white background on Windows.
%       See ISPC and COMPUTER.
if ispc && isequal(get(hObject,'BackgroundColor'), get(0,'defaultUicontrolBackgroundColor'))
    set(hObject,'BackgroundColor','white');
end


function edit35_Callback(hObject, eventdata, handles)
% hObject    handle to edit35 (see GCBO)
% eventdata  reserved - to be defined in a future version of MATLAB
% handles    structure with handles and user data (see GUIDATA)

% Hints: get(hObject,'String') returns contents of edit35 as text
%        str2double(get(hObject,'String')) returns contents of edit35 as a double
input=str2num(get(hObject,'String'));%¼ì²éÊäÈëÊÇ·ñÎª¿Õ. Èç¹ûÎª¿Õ,ÔòÄ¬ÈÏÏÔÊ¾Îª0
if (isempty(input))	
set(hObject,'String','0')
end
guidata(hObject,handles);%±£´æhandles½á¹¹Ìå£¬Ö»ÒªÔÚhandles½á¹¹ÌåÓÐ¸Ä±äÊ±£¬²ÅÐèÒª±£´æ %guidata(hObject, handles);%ÕâÀïÓÉÓÚhandlesÃ»ÓÐ¸Ä±ä£¬¹ÊÕâÀïÆäÊµÃ»ÓÐ±ØÒª£¬µ«ÊÇÎªÁË±ÜÃâÇ±ÔÚµÄ²»±ØÒªÂé·³£¬½¨ÒéÔÚËùÓÐCallback¶¼Ìí¼Ó¸ÃÃüÁî¡£


% --- Executes during object creation, after setting all properties.
function edit35_CreateFcn(hObject, eventdata, handles)
% hObject    handle to edit35 (see GCBO)
% eventdata  reserved - to be defined in a future version of MATLAB
% handles    empty - handles not created until after all CreateFcns called

% Hint: edit controls usually have a white background on Windows.
%       See ISPC and COMPUTER.
if ispc && isequal(get(hObject,'BackgroundColor'), get(0,'defaultUicontrolBackgroundColor'))
    set(hObject,'BackgroundColor','white');
end


function edit36_Callback(hObject, eventdata, handles)
% hObject    handle to edit36 (see GCBO)
% eventdata  reserved - to be defined in a future version of MATLAB
% handles    structure with handles and user data (see GUIDATA)

% Hints: get(hObject,'String') returns contents of edit36 as text
%        str2double(get(hObject,'String')) returns contents of edit36 as a double
input=str2num(get(hObject,'String'));%¼ì²éÊäÈëÊÇ·ñÎª¿Õ. Èç¹ûÎª¿Õ,ÔòÄ¬ÈÏÏÔÊ¾Îª0
if (isempty(input))	
set(hObject,'String','0')
end
guidata(hObject,handles);%±£´æhandles½á¹¹Ìå£¬Ö»ÒªÔÚhandles½á¹¹ÌåÓÐ¸Ä±äÊ±£¬²ÅÐèÒª±£´æ %guidata(hObject, handles);%ÕâÀïÓÉÓÚhandlesÃ»ÓÐ¸Ä±ä£¬¹ÊÕâÀïÆäÊµÃ»ÓÐ±ØÒª£¬µ«ÊÇÎªÁË±ÜÃâÇ±ÔÚµÄ²»±ØÒªÂé·³£¬½¨ÒéÔÚËùÓÐCallback¶¼Ìí¼Ó¸ÃÃüÁî¡£
%Np = str2double(get(handles.edit1,'String'));
%Ng = str2double(get(handles.edit2,'String'));
%mn = str2double(get(handles.edit3,'String'));
%alpha = deg2rad(str2double(get(handles.edit4,'String')));%pay attention deg2rad(20)
%hax = str2double(get(handles.edit5,'String'));
%wp = str2double(get(handles.edit6,'String'));
%xp = str2double(get(handles.edit7,'String'));
%xg = str2double(get(handles.edit8,'String'));

%×¢Òâ ÒÔÏÂÊÇÇóµÈ±äÎ»³ÝÂÖ£¬¼´ xg + xp =0
%Çó´«¶¯±È
%mg = Ng / Np;
%wg = wp / mg;
%Çó·Ö¶ÈÔ²°ë¾¶r R
%r = mn * Np / 2;
%R = mn * Ng / 2;
%Çó»ùÔ²°ë¾¶
%rb = r * cos(alpha);
%Rb = R * cos(alpha);
%¶¨Òå³Ý¶¥¸ß²¢ÇÒÇó³Ý¶¥Ô²°ë¾¶
%hap = (hax + xp) * mn;
%hag = (hax + xg) * mn;
%ro = r + hap;
%Ro = R + hag;
%S1=0;
%½ÓÏÂÀ´ÇóÉäÁ÷Æ«ÖÃSÒÔ¼°ÈëÉä½ÇbetaµÄ·¶Î§
% 0<S<S0
%S0 = (hag * mg - hap)/(mg + 1) + (hag^2 - hap^2)/(2 * r * (mg + 1));
%m1=num2str(S1);
%m2=num2str(S0);
%set(handles.edit9,'String',m1)
%set(handles.edit10,'String',m2);%±£´æ½á¹¹Ìå£¬½«½á¹û¸³Öµ¸øedit14¿Õ¼äµÄstringÊôÐÔ£¬ÓÚÊÇ¾Í¿ÉÒÔÏÔÊ¾½á¹ûÁË


% --- Executes during object creation, after setting all properties.
function edit36_CreateFcn(hObject, eventdata, handles)
% hObject    handle to edit36 (see GCBO)
% eventdata  reserved - to be defined in a future version of MATLAB
% handles    empty - handles not created until after all CreateFcns called

% Hint: edit controls usually have a white background on Windows.
%       See ISPC and COMPUTER.
if ispc && isequal(get(hObject,'BackgroundColor'), get(0,'defaultUicontrolBackgroundColor'))
    set(hObject,'BackgroundColor','white');
end


function edit37_Callback(hObject, eventdata, handles)
% hObject    handle to edit37 (see GCBO)
% eventdata  reserved - to be defined in a future version of MATLAB
% handles    structure with handles and user data (see GUIDATA)

% Hints: get(hObject,'String') returns contents of edit37 as text
%        str2double(get(hObject,'String')) returns contents of edit37 as a double
input=str2num(get(hObject,'String'));%¼ì²éÊäÈëÊÇ·ñÎª¿Õ. Èç¹ûÎª¿Õ,ÔòÄ¬ÈÏÏÔÊ¾Îª0
if (isempty(input))	
set(hObject,'String','0')
end
guidata(hObject,handles);%±£´æhandles½á¹¹Ìå£¬Ö»ÒªÔÚhandles½á¹¹ÌåÓÐ¸Ä±äÊ±£¬²ÅÐèÒª±£´æ %guidata(hObject, handles);%ÕâÀïÓÉÓÚhandlesÃ»ÓÐ¸Ä±ä£¬¹ÊÕâÀïÆäÊµÃ»ÓÐ±ØÒª£¬µ«ÊÇÎªÁË±ÜÃâÇ±ÔÚµÄ²»±ØÒªÂé·³£¬½¨ÒéÔÚËùÓÐCallback¶¼Ìí¼Ó¸ÃÃüÁî¡£


% --- Executes during object creation, after setting all properties.
function edit37_CreateFcn(hObject, eventdata, handles)
% hObject    handle to edit37 (see GCBO)
% eventdata  reserved - to be defined in a future version of MATLAB
% handles    empty - handles not created until after all CreateFcns called

% Hint: edit controls usually have a white background on Windows.
%       See ISPC and COMPUTER.
if ispc && isequal(get(hObject,'BackgroundColor'), get(0,'defaultUicontrolBackgroundColor'))
    set(hObject,'BackgroundColor','white');
end


function edit38_Callback(hObject, eventdata, handles)
% hObject    handle to edit38 (see GCBO)
% eventdata  reserved - to be defined in a future version of MATLAB
% handles    structure with handles and user data (see GUIDATA)

% Hints: get(hObject,'String') returns contents of edit38 as text
%        str2double(get(hObject,'String')) returns contents of edit38 as a double
input=str2num(get(hObject,'String'));%¼ì²éÊäÈëÊÇ·ñÎª¿Õ. Èç¹ûÎª¿Õ,ÔòÄ¬ÈÏÏÔÊ¾Îª0
if (isempty(input))	
set(hObject,'String','0')
end
guidata(hObject,handles);%±£´æhandles½á¹¹Ìå£¬Ö»ÒªÔÚhandles½á¹¹ÌåÓÐ¸Ä±äÊ±£¬²ÅÐèÒª±£´æ %guidata(hObject, handles);%ÕâÀïÓÉÓÚhandlesÃ»ÓÐ¸Ä±ä£¬¹ÊÕâÀïÆäÊµÃ»ÓÐ±ØÒª£¬µ«ÊÇÎªÁË±ÜÃâÇ±ÔÚµÄ²»±ØÒªÂé·³£¬½¨ÒéÔÚËùÓÐCallback¶¼Ìí¼Ó¸ÃÃüÁî¡£


% --- Executes during object creation, after setting all properties.
function edit38_CreateFcn(hObject, eventdata, handles)
% hObject    handle to edit38 (see GCBO)
% eventdata  reserved - to be defined in a future version of MATLAB
% handles    empty - handles not created until after all CreateFcns called

% Hint: edit controls usually have a white background on Windows.
%       See ISPC and COMPUTER.
if ispc && isequal(get(hObject,'BackgroundColor'), get(0,'defaultUicontrolBackgroundColor'))
    set(hObject,'BackgroundColor','white');
end


function edit39_Callback(hObject, eventdata, handles)
% hObject    handle to edit39 (see GCBO)
% eventdata  reserved - to be defined in a future version of MATLAB
% handles    structure with handles and user data (see GUIDATA)

% Hints: get(hObject,'String') returns contents of edit39 as text
%        str2double(get(hObject,'String')) returns contents of edit39 as a double
input=str2num(get(hObject,'String'));%¼ì²éÊäÈëÊÇ·ñÎª¿Õ. Èç¹ûÎª¿Õ,ÔòÄ¬ÈÏÏÔÊ¾Îª0
if (isempty(input))	
set(hObject,'String','0')
end
guidata(hObject,handles);%±£´æhandles½á¹¹Ìå£¬Ö»ÒªÔÚhandles½á¹¹ÌåÓÐ¸Ä±äÊ±£¬²ÅÐèÒª±£´æ %guidata(hObject, handles);%ÕâÀïÓÉÓÚhandlesÃ»ÓÐ¸Ä±ä£¬¹ÊÕâÀïÆäÊµÃ»ÓÐ±ØÒª£¬µ«ÊÇÎªÁË±ÜÃâÇ±ÔÚµÄ²»±ØÒªÂé·³£¬½¨ÒéÔÚËùÓÐCallback¶¼Ìí¼Ó¸ÃÃüÁî¡£


% --- Executes during object creation, after setting all properties.
function edit39_CreateFcn(hObject, eventdata, handles)
% hObject    handle to edit39 (see GCBO)
% eventdata  reserved - to be defined in a future version of MATLAB
% handles    empty - handles not created until after all CreateFcns called

% Hint: edit controls usually have a white background on Windows.
%       See ISPC and COMPUTER.
if ispc && isequal(get(hObject,'BackgroundColor'), get(0,'defaultUicontrolBackgroundColor'))
    set(hObject,'BackgroundColor','white');
end


function edit40_Callback(hObject, eventdata, handles)
% hObject    handle to edit40 (see GCBO)
% eventdata  reserved - to be defined in a future version of MATLAB
% handles    structure with handles and user data (see GUIDATA)

% Hints: get(hObject,'String') returns contents of edit40 as text
%        str2double(get(hObject,'String')) returns contents of edit40 as a double
input=str2num(get(hObject,'String'));%¼ì²éÊäÈëÊÇ·ñÎª¿Õ. Èç¹ûÎª¿Õ,ÔòÄ¬ÈÏÏÔÊ¾Îª0
if (isempty(input))	
set(hObject,'String','0')
end
guidata(hObject,handles);%±£´æhandles½á¹¹Ìå£¬Ö»ÒªÔÚhandles½á¹¹ÌåÓÐ¸Ä±äÊ±£¬²ÅÐèÒª±£´æ %guidata(hObject, handles);%ÕâÀïÓÉÓÚhandlesÃ»ÓÐ¸Ä±ä£¬¹ÊÕâÀïÆäÊµÃ»ÓÐ±ØÒª£¬µ«ÊÇÎªÁË±ÜÃâÇ±ÔÚµÄ²»±ØÒªÂé·³£¬½¨ÒéÔÚËùÓÐCallback¶¼Ìí¼Ó¸ÃÃüÁî¡£


% --- Executes during object creation, after setting all properties.
function edit40_CreateFcn(hObject, eventdata, handles)
% hObject    handle to edit40 (see GCBO)
% eventdata  reserved - to be defined in a future version of MATLAB
% handles    empty - handles not created until after all CreateFcns called

% Hint: edit controls usually have a white background on Windows.
%       See ISPC and COMPUTER.
if ispc && isequal(get(hObject,'BackgroundColor'), get(0,'defaultUicontrolBackgroundColor'))
    set(hObject,'BackgroundColor','white');
end


function edit41_Callback(hObject, eventdata, handles)
% hObject    handle to edit41 (see GCBO)
% eventdata  reserved - to be defined in a future version of MATLAB
% handles    structure with handles and user data (see GUIDATA)

% Hints: get(hObject,'String') returns contents of edit41 as text
%        str2double(get(hObject,'String')) returns contents of edit41 as a double
input=str2num(get(hObject,'String'));%¼ì²éÊäÈëÊÇ·ñÎª¿Õ. Èç¹ûÎª¿Õ,ÔòÄ¬ÈÏÏÔÊ¾Îª0
if (isempty(input))	
set(hObject,'String','0')
end
guidata(hObject,handles);%±£´æhandles½á¹¹Ìå£¬Ö»ÒªÔÚhandles½á¹¹ÌåÓÐ¸Ä±äÊ±£¬²ÅÐèÒª±£´æ %guidata(hObject, handles);%ÕâÀïÓÉÓÚhandlesÃ»ÓÐ¸Ä±ä£¬¹ÊÕâÀïÆäÊµÃ»ÓÐ±ØÒª£¬µ«ÊÇÎªÁË±ÜÃâÇ±ÔÚµÄ²»±ØÒªÂé·³£¬½¨ÒéÔÚËùÓÐCallback¶¼Ìí¼Ó¸ÃÃüÁî¡£


% --- Executes during object creation, after setting all properties.
function edit41_CreateFcn(hObject, eventdata, handles)
% hObject    handle to edit41 (see GCBO)
% eventdata  reserved - to be defined in a future version of MATLAB
% handles    empty - handles not created until after all CreateFcns called

% Hint: edit controls usually have a white background on Windows.
%       See ISPC and COMPUTER.
if ispc && isequal(get(hObject,'BackgroundColor'), get(0,'defaultUicontrolBackgroundColor'))
    set(hObject,'BackgroundColor','white');
end


function edit42_Callback(hObject, eventdata, handles)
% hObject    handle to edit42 (see GCBO)
% eventdata  reserved - to be defined in a future version of MATLAB
% handles    structure with handles and user data (see GUIDATA)

% Hints: get(hObject,'String') returns contents of edit42 as text
%        str2double(get(hObject,'String')) returns contents of edit42 as a double
input=str2num(get(hObject,'String'));%¼ì²éÊäÈëÊÇ·ñÎª¿Õ. Èç¹ûÎª¿Õ,ÔòÄ¬ÈÏÏÔÊ¾Îª0
if (isempty(input))	
set(hObject,'String','0')
end
guidata(hObject,handles);%±£´æhandles½á¹¹Ìå£¬Ö»ÒªÔÚhandles½á¹¹ÌåÓÐ¸Ä±äÊ±£¬²ÅÐèÒª±£´æ %guidata(hObject, handles);%ÕâÀïÓÉÓÚhandlesÃ»ÓÐ¸Ä±ä£¬¹ÊÕâÀïÆäÊµÃ»ÓÐ±ØÒª£¬µ«ÊÇÎªÁË±ÜÃâÇ±ÔÚµÄ²»±ØÒªÂé·³£¬½¨ÒéÔÚËùÓÐCallback¶¼Ìí¼Ó¸ÃÃüÁî¡£


% --- Executes during object creation, after setting all properties.
function edit42_CreateFcn(hObject, eventdata, handles)
% hObject    handle to edit42 (see GCBO)
% eventdata  reserved - to be defined in a future version of MATLAB
% handles    empty - handles not created until after all CreateFcns called

% Hint: edit controls usually have a white background on Windows.
%       See ISPC and COMPUTER.
if ispc && isequal(get(hObject,'BackgroundColor'), get(0,'defaultUicontrolBackgroundColor'))
    set(hObject,'BackgroundColor','white');
end


function edit43_Callback(hObject, eventdata, handles)
% hObject    handle to edit43 (see GCBO)
% eventdata  reserved - to be defined in a future version of MATLAB
% handles    structure with handles and user data (see GUIDATA)

% Hints: get(hObject,'String') returns contents of edit43 as text
%        str2double(get(hObject,'String')) returns contents of edit43 as a double
input=str2num(get(hObject,'String'));%¼ì²éÊäÈëÊÇ·ñÎª¿Õ. Èç¹ûÎª¿Õ,ÔòÄ¬ÈÏÏÔÊ¾Îª0
if (isempty(input))	
set(hObject,'String','0')
end
guidata(hObject,handles);%±£´æhandles½á¹¹Ìå£¬Ö»ÒªÔÚhandles½á¹¹ÌåÓÐ¸Ä±äÊ±£¬²ÅÐèÒª±£´æ %guidata(hObject, handles);%ÕâÀïÓÉÓÚhandlesÃ»ÓÐ¸Ä±ä£¬¹ÊÕâÀïÆäÊµÃ»ÓÐ±ØÒª£¬µ«ÊÇÎªÁË±ÜÃâÇ±ÔÚµÄ²»±ØÒªÂé·³£¬½¨ÒéÔÚËùÓÐCallback¶¼Ìí¼Ó¸ÃÃüÁî¡£


% --- Executes during object creation, after setting all properties.
function edit43_CreateFcn(hObject, eventdata, handles)
% hObject    handle to edit43 (see GCBO)
% eventdata  reserved - to be defined in a future version of MATLAB
% handles    empty - handles not created until after all CreateFcns called

% Hint: edit controls usually have a white background on Windows.
%       See ISPC and COMPUTER.
if ispc && isequal(get(hObject,'BackgroundColor'), get(0,'defaultUicontrolBackgroundColor'))
    set(hObject,'BackgroundColor','white');
end


function edit44_Callback(hObject, eventdata, handles)
% hObject    handle to edit44 (see GCBO)
% eventdata  reserved - to be defined in a future version of MATLAB
% handles    structure with handles and user data (see GUIDATA)

% Hints: get(hObject,'String') returns contents of edit44 as text
%        str2double(get(hObject,'String')) returns contents of edit44 as a double
input=str2num(get(hObject,'String'));%¼ì²éÊäÈëÊÇ·ñÎª¿Õ. Èç¹ûÎª¿Õ,ÔòÄ¬ÈÏÏÔÊ¾Îª0
if (isempty(input))	
set(hObject,'String','0')
end
guidata(hObject,handles);%±£´æhandles½á¹¹Ìå£¬Ö»ÒªÔÚhandles½á¹¹ÌåÓÐ¸Ä±äÊ±£¬²ÅÐèÒª±£´æ %guidata(hObject, handles);%ÕâÀïÓÉÓÚhandlesÃ»ÓÐ¸Ä±ä£¬¹ÊÕâÀïÆäÊµÃ»ÓÐ±ØÒª£¬µ«ÊÇÎªÁË±ÜÃâÇ±ÔÚµÄ²»±ØÒªÂé·³£¬½¨ÒéÔÚËùÓÐCallback¶¼Ìí¼Ó¸ÃÃüÁî¡£


% --- Executes during object creation, after setting all properties.
function edit44_CreateFcn(hObject, eventdata, handles)
% hObject    handle to edit44 (see GCBO)
% eventdata  reserved - to be defined in a future version of MATLAB
% handles    empty - handles not created until after all CreateFcns called

% Hint: edit controls usually have a white background on Windows.
%       See ISPC and COMPUTER.
if ispc && isequal(get(hObject,'BackgroundColor'), get(0,'defaultUicontrolBackgroundColor'))
    set(hObject,'BackgroundColor','white');
end


function edit45_Callback(hObject, eventdata, handles)
% hObject    handle to edit45 (see GCBO)
% eventdata  reserved - to be defined in a future version of MATLAB
% handles    structure with handles and user data (see GUIDATA)

% Hints: get(hObject,'String') returns contents of edit45 as text
%        str2double(get(hObject,'String')) returns contents of edit45 as a double
input=str2num(get(hObject,'String'));%¼ì²éÊäÈëÊÇ·ñÎª¿Õ. Èç¹ûÎª¿Õ,ÔòÄ¬ÈÏÏÔÊ¾Îª0
if (isempty(input))	
set(hObject,'String','0')
end
guidata(hObject,handles);%±£´æhandles½á¹¹Ìå£¬Ö»ÒªÔÚhandles½á¹¹ÌåÓÐ¸Ä±äÊ±£¬²ÅÐèÒª±£´æ %guidata(hObject, handles);%ÕâÀïÓÉÓÚhandlesÃ»ÓÐ¸Ä±ä£¬¹ÊÕâÀïÆäÊµÃ»ÓÐ±ØÒª£¬µ«ÊÇÎªÁË±ÜÃâÇ±ÔÚµÄ²»±ØÒªÂé·³£¬½¨ÒéÔÚËùÓÐCallback¶¼Ìí¼Ó¸ÃÃüÁî¡£


% --- Executes during object creation, after setting all properties.
function edit45_CreateFcn(hObject, eventdata, handles)
% hObject    handle to edit45 (see GCBO)
% eventdata  reserved - to be defined in a future version of MATLAB
% handles    empty - handles not created until after all CreateFcns called

% Hint: edit controls usually have a white background on Windows.
%       See ISPC and COMPUTER.
if ispc && isequal(get(hObject,'BackgroundColor'), get(0,'defaultUicontrolBackgroundColor'))
    set(hObject,'BackgroundColor','white');
end


function edit46_Callback(hObject, eventdata, handles)
% hObject    handle to edit46 (see GCBO)
% eventdata  reserved - to be defined in a future version of MATLAB
% handles    structure with handles and user data (see GUIDATA)

% Hints: get(hObject,'String') returns contents of edit46 as text
%        str2double(get(hObject,'String')) returns contents of edit46 as a double
input=str2num(get(hObject,'String'));%¼ì²éÊäÈëÊÇ·ñÎª¿Õ. Èç¹ûÎª¿Õ,ÔòÄ¬ÈÏÏÔÊ¾Îª0
if (isempty(input))	
set(hObject,'String','0')
end
guidata(hObject,handles);%±£´æhandles½á¹¹Ìå£¬Ö»ÒªÔÚhandles½á¹¹ÌåÓÐ¸Ä±äÊ±£¬²ÅÐèÒª±£´æ %guidata(hObject, handles);%ÕâÀïÓÉÓÚhandlesÃ»ÓÐ¸Ä±ä£¬¹ÊÕâÀïÆäÊµÃ»ÓÐ±ØÒª£¬µ«ÊÇÎªÁË±ÜÃâÇ±ÔÚµÄ²»±ØÒªÂé·³£¬½¨ÒéÔÚËùÓÐCallback¶¼Ìí¼Ó¸ÃÃüÁî¡£


% --- Executes during object creation, after setting all properties.
function edit46_CreateFcn(hObject, eventdata, handles)
% hObject    handle to edit46 (see GCBO)
% eventdata  reserved - to be defined in a future version of MATLAB
% handles    empty - handles not created until after all CreateFcns called

% Hint: edit controls usually have a white background on Windows.
%       See ISPC and COMPUTER.
if ispc && isequal(get(hObject,'BackgroundColor'), get(0,'defaultUicontrolBackgroundColor'))
    set(hObject,'BackgroundColor','white');
end


function edit47_Callback(hObject, eventdata, handles)
% hObject    handle to edit47 (see GCBO)
% eventdata  reserved - to be defined in a future version of MATLAB
% handles    structure with handles and user data (see GUIDATA)

% Hints: get(hObject,'String') returns contents of edit47 as text
%        str2double(get(hObject,'String')) returns contents of edit47 as a double
input=str2num(get(hObject,'String'));%¼ì²éÊäÈëÊÇ·ñÎª¿Õ. Èç¹ûÎª¿Õ,ÔòÄ¬ÈÏÏÔÊ¾Îª0
if (isempty(input))	
set(hObject,'String','0')
end
guidata(hObject,handles);%±£´æhandles½á¹¹Ìå£¬Ö»ÒªÔÚhandles½á¹¹ÌåÓÐ¸Ä±äÊ±£¬²ÅÐèÒª±£´æ %guidata(hObject, handles);%ÕâÀïÓÉÓÚhandlesÃ»ÓÐ¸Ä±ä£¬¹ÊÕâÀïÆäÊµÃ»ÓÐ±ØÒª£¬µ«ÊÇÎªÁË±ÜÃâÇ±ÔÚµÄ²»±ØÒªÂé·³£¬½¨ÒéÔÚËùÓÐCallback¶¼Ìí¼Ó¸ÃÃüÁî¡£
%Np = str2double(get(handles.edit1,'String'));
%Ng = str2double(get(handles.edit2,'String'));
%mn = str2double(get(handles.edit3,'String'));
%alpha = deg2rad(str2double(get(handles.edit4,'String')));%pay attention deg2rad(20)
%hax = str2double(get(handles.edit5,'String'));
%wp = str2double(get(handles.edit6,'String'));
%xp = str2double(get(handles.edit7,'String'));
%xg = str2double(get(handles.edit8,'String'));

%×¢Òâ ÒÔÏÂÊÇÇóµÈ±äÎ»³ÝÂÖ£¬¼´ xg + xp =0
%Çó´«¶¯±È
%mg = Ng / Np;
%wg = wp / mg;
%Çó·Ö¶ÈÔ²°ë¾¶r R
%r = mn * Np / 2;
%R = mn * Ng / 2;
%Çó»ùÔ²°ë¾¶
%rb = r * cos(alpha);
%Rb = R * cos(alpha);
%¶¨Òå³Ý¶¥¸ß²¢ÇÒÇó³Ý¶¥Ô²°ë¾¶
%hap = (hax + xp) * mn;
%hag = (hax + xg) * mn;
%ro = r + hap;
%Ro = R + hag;
%S1=0;
%½ÓÏÂÀ´ÇóÉäÁ÷Æ«ÖÃSÒÔ¼°ÈëÉä½ÇbetaµÄ·¶Î§
% 0<S<S0
%S0 = (hag * mg - hap)/(mg + 1) + (hag^2 - hap^2)/(2 * r * (mg + 1));
%m1=num2str(S1);
%m2=num2str(S0);
%set(handles.edit9,'String',m1)
%set(handles.edit10,'String',m2);%±£´æ½á¹¹Ìå£¬½«½á¹û¸³Öµ¸øedit14¿Õ¼äµÄstringÊôÐÔ£¬ÓÚÊÇ¾Í¿ÉÒÔÏÔÊ¾½á¹ûÁË


% --- Executes during object creation, after setting all properties.
function edit47_CreateFcn(hObject, eventdata, handles)
% hObject    handle to edit47 (see GCBO)
% eventdata  reserved - to be defined in a future version of MATLAB
% handles    empty - handles not created until after all CreateFcns called

% Hint: edit controls usually have a white background on Windows.
%       See ISPC and COMPUTER.
if ispc && isequal(get(hObject,'BackgroundColor'), get(0,'defaultUicontrolBackgroundColor'))
    set(hObject,'BackgroundColor','white');
end


function edit48_Callback(hObject, eventdata, handles)
% hObject    handle to edit48 (see GCBO)
% eventdata  reserved - to be defined in a future version of MATLAB
% handles    structure with handles and user data (see GUIDATA)

% Hints: get(hObject,'String') returns contents of edit48 as text
%        str2double(get(hObject,'String')) returns contents of edit48 as a double
input=str2num(get(hObject,'String'));%¼ì²éÊäÈëÊÇ·ñÎª¿Õ. Èç¹ûÎª¿Õ,ÔòÄ¬ÈÏÏÔÊ¾Îª0
if (isempty(input))	
set(hObject,'String','0')
end
guidata(hObject,handles);%±£´æhandles½á¹¹Ìå£¬Ö»ÒªÔÚhandles½á¹¹ÌåÓÐ¸Ä±äÊ±£¬²ÅÐèÒª±£´æ %guidata(hObject, handles);%ÕâÀïÓÉÓÚhandlesÃ»ÓÐ¸Ä±ä£¬¹ÊÕâÀïÆäÊµÃ»ÓÐ±ØÒª£¬µ«ÊÇÎªÁË±ÜÃâÇ±ÔÚµÄ²»±ØÒªÂé·³£¬½¨ÒéÔÚËùÓÐCallback¶¼Ìí¼Ó¸ÃÃüÁî¡£


% --- Executes during object creation, after setting all properties.
function edit48_CreateFcn(hObject, eventdata, handles)
% hObject    handle to edit48 (see GCBO)
% eventdata  reserved - to be defined in a future version of MATLAB
% handles    empty - handles not created until after all CreateFcns called

% Hint: edit controls usually have a white background on Windows.
%       See ISPC and COMPUTER.
if ispc && isequal(get(hObject,'BackgroundColor'), get(0,'defaultUicontrolBackgroundColor'))
    set(hObject,'BackgroundColor','white');
end


function edit49_Callback(hObject, eventdata, handles)
% hObject    handle to edit49 (see GCBO)
% eventdata  reserved - to be defined in a future version of MATLAB
% handles    structure with handles and user data (see GUIDATA)

% Hints: get(hObject,'String') returns contents of edit49 as text
%        str2double(get(hObject,'String')) returns contents of edit49 as a double
input=str2num(get(hObject,'String'));%¼ì²éÊäÈëÊÇ·ñÎª¿Õ. Èç¹ûÎª¿Õ,ÔòÄ¬ÈÏÏÔÊ¾Îª0
if (isempty(input))	
set(hObject,'String','0')
end
guidata(hObject,handles);%±£´æhandles½á¹¹Ìå£¬Ö»ÒªÔÚhandles½á¹¹ÌåÓÐ¸Ä±äÊ±£¬²ÅÐèÒª±£´æ %guidata(hObject, handles);%ÕâÀïÓÉÓÚhandlesÃ»ÓÐ¸Ä±ä£¬¹ÊÕâÀïÆäÊµÃ»ÓÐ±ØÒª£¬µ«ÊÇÎªÁË±ÜÃâÇ±ÔÚµÄ²»±ØÒªÂé·³£¬½¨ÒéÔÚËùÓÐCallback¶¼Ìí¼Ó¸ÃÃüÁî¡£


% --- Executes during object creation, after setting all properties.
function edit49_CreateFcn(hObject, eventdata, handles)
% hObject    handle to edit49 (see GCBO)
% eventdata  reserved - to be defined in a future version of MATLAB
% handles    empty - handles not created until after all CreateFcns called

% Hint: edit controls usually have a white background on Windows.
%       See ISPC and COMPUTER.
if ispc && isequal(get(hObject,'BackgroundColor'), get(0,'defaultUicontrolBackgroundColor'))
    set(hObject,'BackgroundColor','white');
end


function edit50_Callback(hObject, eventdata, handles)
% hObject    handle to edit50 (see GCBO)
% eventdata  reserved - to be defined in a future version of MATLAB
% handles    structure with handles and user data (see GUIDATA)

% Hints: get(hObject,'String') returns contents of edit50 as text
%        str2double(get(hObject,'String')) returns contents of edit50 as a double
input=str2num(get(hObject,'String'));%¼ì²éÊäÈëÊÇ·ñÎª¿Õ. Èç¹ûÎª¿Õ,ÔòÄ¬ÈÏÏÔÊ¾Îª0
if (isempty(input))	
set(hObject,'String','0')
end
guidata(hObject,handles);%±£´æhandles½á¹¹Ìå£¬Ö»ÒªÔÚhandles½á¹¹ÌåÓÐ¸Ä±äÊ±£¬²ÅÐèÒª±£´æ %guidata(hObject, handles);%ÕâÀïÓÉÓÚhandlesÃ»ÓÐ¸Ä±ä£¬¹ÊÕâÀïÆäÊµÃ»ÓÐ±ØÒª£¬µ«ÊÇÎªÁË±ÜÃâÇ±ÔÚµÄ²»±ØÒªÂé·³£¬½¨ÒéÔÚËùÓÐCallback¶¼Ìí¼Ó¸ÃÃüÁî¡£


% --- Executes during object creation, after setting all properties.
function edit50_CreateFcn(hObject, eventdata, handles)
% hObject    handle to edit50 (see GCBO)
% eventdata  reserved - to be defined in a future version of MATLAB
% handles    empty - handles not created until after all CreateFcns called

% Hint: edit controls usually have a white background on Windows.
%       See ISPC and COMPUTER.
if ispc && isequal(get(hObject,'BackgroundColor'), get(0,'defaultUicontrolBackgroundColor'))
    set(hObject,'BackgroundColor','white');
end


function edit51_Callback(hObject, eventdata, handles)
% hObject    handle to edit51 (see GCBO)
% eventdata  reserved - to be defined in a future version of MATLAB
% handles    structure with handles and user data (see GUIDATA)

% Hints: get(hObject,'String') returns contents of edit51 as text
%        str2double(get(hObject,'String')) returns contents of edit51 as a double
input=str2num(get(hObject,'String'));%¼ì²éÊäÈëÊÇ·ñÎª¿Õ. Èç¹ûÎª¿Õ,ÔòÄ¬ÈÏÏÔÊ¾Îª0
if (isempty(input))	
set(hObject,'String','0')
end
guidata(hObject,handles);%±£´æhandles½á¹¹Ìå£¬Ö»ÒªÔÚhandles½á¹¹ÌåÓÐ¸Ä±äÊ±£¬²ÅÐèÒª±£´æ %guidata(hObject, handles);%ÕâÀïÓÉÓÚhandlesÃ»ÓÐ¸Ä±ä£¬¹ÊÕâÀïÆäÊµÃ»ÓÐ±ØÒª£¬µ«ÊÇÎªÁË±ÜÃâÇ±ÔÚµÄ²»±ØÒªÂé·³£¬½¨ÒéÔÚËùÓÐCallback¶¼Ìí¼Ó¸ÃÃüÁî¡£


% --- Executes during object creation, after setting all properties.
function edit51_CreateFcn(hObject, eventdata, handles)
% hObject    handle to edit51 (see GCBO)
% eventdata  reserved - to be defined in a future version of MATLAB
% handles    empty - handles not created until after all CreateFcns called

% Hint: edit controls usually have a white background on Windows.
%       See ISPC and COMPUTER.
if ispc && isequal(get(hObject,'BackgroundColor'), get(0,'defaultUicontrolBackgroundColor'))
    set(hObject,'BackgroundColor','white');
end


function edit52_Callback(hObject, eventdata, handles)
% hObject    handle to edit52 (see GCBO)
% eventdata  reserved - to be defined in a future version of MATLAB
% handles    structure with handles and user data (see GUIDATA)

% Hints: get(hObject,'String') returns contents of edit52 as text
%        str2double(get(hObject,'String')) returns contents of edit52 as a double
input=str2num(get(hObject,'String'));%¼ì²éÊäÈëÊÇ·ñÎª¿Õ. Èç¹ûÎª¿Õ,ÔòÄ¬ÈÏÏÔÊ¾Îª0
if (isempty(input))	
set(hObject,'String','0')
end
guidata(hObject,handles);%±£´æhandles½á¹¹Ìå£¬Ö»ÒªÔÚhandles½á¹¹ÌåÓÐ¸Ä±äÊ±£¬²ÅÐèÒª±£´æ %guidata(hObject, handles);%ÕâÀïÓÉÓÚhandlesÃ»ÓÐ¸Ä±ä£¬¹ÊÕâÀïÆäÊµÃ»ÓÐ±ØÒª£¬µ«ÊÇÎªÁË±ÜÃâÇ±ÔÚµÄ²»±ØÒªÂé·³£¬½¨ÒéÔÚËùÓÐCallback¶¼Ìí¼Ó¸ÃÃüÁî¡£


% --- Executes during object creation, after setting all properties.
function edit52_CreateFcn(hObject, eventdata, handles)
% hObject    handle to edit52 (see GCBO)
% eventdata  reserved - to be defined in a future version of MATLAB
% handles    empty - handles not created until after all CreateFcns called

% Hint: edit controls usually have a white background on Windows.
%       See ISPC and COMPUTER.
if ispc && isequal(get(hObject,'BackgroundColor'), get(0,'defaultUicontrolBackgroundColor'))
    set(hObject,'BackgroundColor','white');
end


function edit53_Callback(hObject, eventdata, handles)
% hObject    handle to edit53 (see GCBO)
% eventdata  reserved - to be defined in a future version of MATLAB
% handles    structure with handles and user data (see GUIDATA)

% Hints: get(hObject,'String') returns contents of edit53 as text
%        str2double(get(hObject,'String')) returns contents of edit53 as a double
input=str2num(get(hObject,'String'));%¼ì²éÊäÈëÊÇ·ñÎª¿Õ. Èç¹ûÎª¿Õ,ÔòÄ¬ÈÏÏÔÊ¾Îª0
if (isempty(input))	
set(hObject,'String','0')
end
guidata(hObject,handles);%±£´æhandles½á¹¹Ìå£¬Ö»ÒªÔÚhandles½á¹¹ÌåÓÐ¸Ä±äÊ±£¬²ÅÐèÒª±£´æ %guidata(hObject, handles);%ÕâÀïÓÉÓÚhandlesÃ»ÓÐ¸Ä±ä£¬¹ÊÕâÀïÆäÊµÃ»ÓÐ±ØÒª£¬µ«ÊÇÎªÁË±ÜÃâÇ±ÔÚµÄ²»±ØÒªÂé·³£¬½¨ÒéÔÚËùÓÐCallback¶¼Ìí¼Ó¸ÃÃüÁî¡£


% --- Executes during object creation, after setting all properties.
function edit53_CreateFcn(hObject, eventdata, handles)
% hObject    handle to edit53 (see GCBO)
% eventdata  reserved - to be defined in a future version of MATLAB
% handles    empty - handles not created until after all CreateFcns called

% Hint: edit controls usually have a white background on Windows.
%       See ISPC and COMPUTER.
if ispc && isequal(get(hObject,'BackgroundColor'), get(0,'defaultUicontrolBackgroundColor'))
    set(hObject,'BackgroundColor','white');
end


% --- Executes on button press in pushbutton2.
function pushbutton2_Callback(hObject, eventdata, handles)
% hObject    handle to pushbutton2 (see GCBO)
% eventdata  reserved - to be defined in a future version of MATLAB
% handles    structure with handles and user data (see GUIDATA)
%
%syms a;               
%syms b;
%syms c;
%syms d;
%syms e;
%syms f;
%syms m;
%syms n;
%syms z;
%syms dp;
%m1 = get(handles.edit55,'String');
%m2 = get(handles.edit56,'String'); 
%m3 = get(handles.edit57,'String');
%m4 = get(handles.edit58,'String');
%m5 = get(handles.edit59,'String');
%m6 = get(handles.edit60,'String');
%m7 = get(handles.edit61,'String');
%m8 = get(handles.edit62,'String');
%m9 = get(handles.edit63,'String');
%m10 = get(handles.edit64,'String');
%m11 = get(handles.edit65,'String');
%m12 = get(handles.edit66,'String');
%m13 = get(handles.edit67,'String');
% aÊÇ×Ö·û´®±äÁ¿£¬ÎÒÃÇÐèÒªÊ¹ÓÃstr2doubleº¯Êý½«Æä×ª»»ÎªÊýÖµ£¬È»ºó²ÅÄÜ¼ÆËã£¬·ñÔò×Ö·û´®ÊÇÃ»·¨¼ÆËãµÄ
%n1 = str2double(m1);
%n2 = str2double(m2);
%n3 = str2double(m3);
%n4 = str2double(m4);
%n5 = str2double(m5);
%n6 = str2double(m6);
%n7 = str2double(m7);
%n8 = str2double(m8);
%n9 = str2double(m9);
%n10 = str2double(m10);
%n11 = str2double(m11);
%n12 = str2double(m12);
%n13 = str2double(m13);
% ¸ñÊ½×ª»»ÎªÊýÖµ
%a = n7/sin(n5*pi/180)+(n6-n8)/cos(n5*pi/180);
%b = (n4-n6-n7*cot(n5*pi/180))*cos(n5*pi/180);
%c = n10/n1*atan((n7+(n6-n8)*tan(n5*pi/180))/n11)+tan(n9*pi/180)-n9*pi/180-n9*pi/180+pi/2;
%d = (n4-n6)*sin(n5*pi/180)-n7*cos(n5*pi/180);

%format long
%k = 0;
%er = 1;
%x = [];
%x(1) = 3;
%fun(z)=a-n12/n13*(atan(z/d)+tan(acos(0.5*n1*n2*cos(n9*pi/180)/sqrt(z*z+d^2)))-acos(0.5*n1*n2*cos(n9*pi/180)/sqrt(z*z+d^2))-c)+b-z;
%dfun(z)=diff(fun(z));

%while er >0.00001
 %  x(2)=x(1)-fun(x(1))/dfun(x(1));
  % er = abs(x(2)-x(1));
  % x(1) = x(2);
  % k = k+1;
%end
%x(1)
%k
%f=real(x(1))
%dp = 0.5*n1*n2+n3*n2-sqrt(f*f+(n4*sin(n5*pi/180)-n6*sin(n5*pi/180)-n7*cos(n5*pi/180))^2)
%e=num2str(dp); %×ª»¯Îª×Ö·û´®
%set(handles.edit68,'String',e);%±£´æ½á¹¹Ìå£¬½«½á¹û¸³Öµ¸øedit14¿Õ¼äµÄstringÊôÐÔ£¬ÓÚÊÇ¾Í¿ÉÒÔÏÔÊ¾½á¹ûÁË
%guidata(hObject,handles);%¸üÐÂ½á¹¹Ìå


function edit54_Callback(hObject, eventdata, handles)
% hObject    handle to edit54 (see GCBO)
% eventdata  reserved - to be defined in a future version of MATLAB
% handles    structure with handles and user data (see GUIDATA)

% Hints: get(hObject,'String') returns contents of edit54 as text
%        str2double(get(hObject,'String')) returns contents of edit54 as a double
input=str2num(get(hObject,'String'));%¼ì²éÊäÈëÊÇ·ñÎª¿Õ. Èç¹ûÎª¿Õ,ÔòÄ¬ÈÏÏÔÊ¾Îª0
if (isempty(input))	
set(hObject,'String','0')
end
guidata(hObject,handles);%±£´æhandles½á¹¹Ìå£¬Ö»ÒªÔÚhandles½á¹¹ÌåÓÐ¸Ä±äÊ±£¬²ÅÐèÒª±£´æ %guidata(hObject, handles);%ÕâÀïÓÉÓÚhandlesÃ»ÓÐ¸Ä±ä£¬¹ÊÕâÀïÆäÊµÃ»ÓÐ±ØÒª£¬µ«ÊÇÎªÁË±ÜÃâÇ±ÔÚµÄ²»±ØÒªÂé·³£¬½¨ÒéÔÚËùÓÐCallback¶¼Ìí¼Ó¸ÃÃüÁî¡£


% --- Executes during object creation, after setting all properties.
function edit54_CreateFcn(hObject, eventdata, handles)
% hObject    handle to edit54 (see GCBO)
% eventdata  reserved - to be defined in a future version of MATLAB
% handles    empty - handles not created until after all CreateFcns called

% Hint: edit controls usually have a white background on Windows.
%       See ISPC and COMPUTER.
if ispc && isequal(get(hObject,'BackgroundColor'), get(0,'defaultUicontrolBackgroundColor'))
    set(hObject,'BackgroundColor','white');
end


function edit55_Callback(hObject, eventdata, handles)
% hObject    handle to edit55 (see GCBO)
% eventdata  reserved - to be defined in a future version of MATLAB
% handles    structure with handles and user data (see GUIDATA)

% Hints: get(hObject,'String') returns contents of edit55 as text
%        str2double(get(hObject,'String')) returns contents of edit55 as a double
input=str2num(get(hObject,'String'));%¼ì²éÊäÈëÊÇ·ñÎª¿Õ. Èç¹ûÎª¿Õ,ÔòÄ¬ÈÏÏÔÊ¾Îª0
if (isempty(input))	
set(hObject,'String','0')
end
guidata(hObject,handles);%±£´æhandles½á¹¹Ìå£¬Ö»ÒªÔÚhandles½á¹¹ÌåÓÐ¸Ä±äÊ±£¬²ÅÐèÒª±£´æ %guidata(hObject, handles);%ÕâÀïÓÉÓÚhandlesÃ»ÓÐ¸Ä±ä£¬¹ÊÕâÀïÆäÊµÃ»ÓÐ±ØÒª£¬µ«ÊÇÎªÁË±ÜÃâÇ±ÔÚµÄ²»±ØÒªÂé·³£¬½¨ÒéÔÚËùÓÐCallback¶¼Ìí¼Ó¸ÃÃüÁî¡£


% --- Executes during object creation, after setting all properties.
function edit55_CreateFcn(hObject, eventdata, handles)
% hObject    handle to edit55 (see GCBO)
% eventdata  reserved - to be defined in a future version of MATLAB
% handles    empty - handles not created until after all CreateFcns called

% Hint: edit controls usually have a white background on Windows.
%       See ISPC and COMPUTER.
if ispc && isequal(get(hObject,'BackgroundColor'), get(0,'defaultUicontrolBackgroundColor'))
    set(hObject,'BackgroundColor','white');
end


function edit56_Callback(hObject, eventdata, handles)
% hObject    handle to edit56 (see GCBO)
% eventdata  reserved - to be defined in a future version of MATLAB
% handles    structure with handles and user data (see GUIDATA)

% Hints: get(hObject,'String') returns contents of edit56 as text
%        str2double(get(hObject,'String')) returns contents of edit56 as a double
input=str2num(get(hObject,'String'));%¼ì²éÊäÈëÊÇ·ñÎª¿Õ. Èç¹ûÎª¿Õ,ÔòÄ¬ÈÏÏÔÊ¾Îª0
if (isempty(input))	
set(hObject,'String','0')
end
guidata(hObject,handles);%±£´æhandles½á¹¹Ìå£¬Ö»ÒªÔÚhandles½á¹¹ÌåÓÐ¸Ä±äÊ±£¬²ÅÐèÒª±£´æ %guidata(hObject, handles);%ÕâÀïÓÉÓÚhandlesÃ»ÓÐ¸Ä±ä£¬¹ÊÕâÀïÆäÊµÃ»ÓÐ±ØÒª£¬µ«ÊÇÎªÁË±ÜÃâÇ±ÔÚµÄ²»±ØÒªÂé·³£¬½¨ÒéÔÚËùÓÐCallback¶¼Ìí¼Ó¸ÃÃüÁî¡£


% --- Executes during object creation, after setting all properties.
function edit56_CreateFcn(hObject, eventdata, handles)
% hObject    handle to edit56 (see GCBO)
% eventdata  reserved - to be defined in a future version of MATLAB
% handles    empty - handles not created until after all CreateFcns called

% Hint: edit controls usually have a white background on Windows.
%       See ISPC and COMPUTER.
if ispc && isequal(get(hObject,'BackgroundColor'), get(0,'defaultUicontrolBackgroundColor'))
    set(hObject,'BackgroundColor','white');
end


function edit57_Callback(hObject, eventdata, handles)
% hObject    handle to edit57 (see GCBO)
% eventdata  reserved - to be defined in a future version of MATLAB
% handles    structure with handles and user data (see GUIDATA)

% Hints: get(hObject,'String') returns contents of edit57 as text
%        str2double(get(hObject,'String')) returns contents of edit57 as a double
input=str2num(get(hObject,'String'));%¼ì²éÊäÈëÊÇ·ñÎª¿Õ. Èç¹ûÎª¿Õ,ÔòÄ¬ÈÏÏÔÊ¾Îª0
if (isempty(input))	
set(hObject,'String','0')
end
guidata(hObject,handles);%±£´æhandles½á¹¹Ìå£¬Ö»ÒªÔÚhandles½á¹¹ÌåÓÐ¸Ä±äÊ±£¬²ÅÐèÒª±£´æ %guidata(hObject, handles);%ÕâÀïÓÉÓÚhandlesÃ»ÓÐ¸Ä±ä£¬¹ÊÕâÀïÆäÊµÃ»ÓÐ±ØÒª£¬µ«ÊÇÎªÁË±ÜÃâÇ±ÔÚµÄ²»±ØÒªÂé·³£¬½¨ÒéÔÚËùÓÐCallback¶¼Ìí¼Ó¸ÃÃüÁî¡£


% --- Executes during object creation, after setting all properties.
function edit57_CreateFcn(hObject, eventdata, handles)
% hObject    handle to edit57 (see GCBO)
% eventdata  reserved - to be defined in a future version of MATLAB
% handles    empty - handles not created until after all CreateFcns called

% Hint: edit controls usually have a white background on Windows.
%       See ISPC and COMPUTER.
if ispc && isequal(get(hObject,'BackgroundColor'), get(0,'defaultUicontrolBackgroundColor'))
    set(hObject,'BackgroundColor','white');
end


function edit58_Callback(hObject, eventdata, handles)
% hObject    handle to edit58 (see GCBO)
% eventdata  reserved - to be defined in a future version of MATLAB
% handles    structure with handles and user data (see GUIDATA)

% Hints: get(hObject,'String') returns contents of edit58 as text
%        str2double(get(hObject,'String')) returns contents of edit58 as a double
input=str2num(get(hObject,'String'));%¼ì²éÊäÈëÊÇ·ñÎª¿Õ. Èç¹ûÎª¿Õ,ÔòÄ¬ÈÏÏÔÊ¾Îª0
if (isempty(input))	
set(hObject,'String','0')
end
guidata(hObject,handles);%±£´æhandles½á¹¹Ìå£¬Ö»ÒªÔÚhandles½á¹¹ÌåÓÐ¸Ä±äÊ±£¬²ÅÐèÒª±£´æ %guidata(hObject, handles);%ÕâÀïÓÉÓÚhandlesÃ»ÓÐ¸Ä±ä£¬¹ÊÕâÀïÆäÊµÃ»ÓÐ±ØÒª£¬µ«ÊÇÎªÁË±ÜÃâÇ±ÔÚµÄ²»±ØÒªÂé·³£¬½¨ÒéÔÚËùÓÐCallback¶¼Ìí¼Ó¸ÃÃüÁî¡£


% --- Executes during object creation, after setting all properties.
function edit58_CreateFcn(hObject, eventdata, handles)
% hObject    handle to edit58 (see GCBO)
% eventdata  reserved - to be defined in a future version of MATLAB
% handles    empty - handles not created until after all CreateFcns called

% Hint: edit controls usually have a white background on Windows.
%       See ISPC and COMPUTER.
if ispc && isequal(get(hObject,'BackgroundColor'), get(0,'defaultUicontrolBackgroundColor'))
    set(hObject,'BackgroundColor','white');
end


function edit59_Callback(hObject, eventdata, handles)
% hObject    handle to edit59 (see GCBO)
% eventdata  reserved - to be defined in a future version of MATLAB
% handles    structure with handles and user data (see GUIDATA)

% Hints: get(hObject,'String') returns contents of edit59 as text
%        str2double(get(hObject,'String')) returns contents of edit59 as a double
input=str2num(get(hObject,'String'));%¼ì²éÊäÈëÊÇ·ñÎª¿Õ. Èç¹ûÎª¿Õ,ÔòÄ¬ÈÏÏÔÊ¾Îª0
if (isempty(input))	
set(hObject,'String','0')
end
guidata(hObject,handles);%±£´æhandles½á¹¹Ìå£¬Ö»ÒªÔÚhandles½á¹¹ÌåÓÐ¸Ä±äÊ±£¬²ÅÐèÒª±£´æ %guidata(hObject, handles);%ÕâÀïÓÉÓÚhandlesÃ»ÓÐ¸Ä±ä£¬¹ÊÕâÀïÆäÊµÃ»ÓÐ±ØÒª£¬µ«ÊÇÎªÁË±ÜÃâÇ±ÔÚµÄ²»±ØÒªÂé·³£¬½¨ÒéÔÚËùÓÐCallback¶¼Ìí¼Ó¸ÃÃüÁî¡£


% --- Executes during object creation, after setting all properties.
function edit59_CreateFcn(hObject, eventdata, handles)
% hObject    handle to edit59 (see GCBO)
% eventdata  reserved - to be defined in a future version of MATLAB
% handles    empty - handles not created until after all CreateFcns called

% Hint: edit controls usually have a white background on Windows.
%       See ISPC and COMPUTER.
if ispc && isequal(get(hObject,'BackgroundColor'), get(0,'defaultUicontrolBackgroundColor'))
    set(hObject,'BackgroundColor','white');
end


function edit60_Callback(hObject, eventdata, handles)
% hObject    handle to edit60 (see GCBO)
% eventdata  reserved - to be defined in a future version of MATLAB
% handles    structure with handles and user data (see GUIDATA)

% Hints: get(hObject,'String') returns contents of edit60 as text
%        str2double(get(hObject,'String')) returns contents of edit60 as a double
input=str2num(get(hObject,'String'));%¼ì²éÊäÈëÊÇ·ñÎª¿Õ. Èç¹ûÎª¿Õ,ÔòÄ¬ÈÏÏÔÊ¾Îª0
if (isempty(input))	
set(hObject,'String','0')
end
guidata(hObject,handles);%±£´æhandles½á¹¹Ìå£¬Ö»ÒªÔÚhandles½á¹¹ÌåÓÐ¸Ä±äÊ±£¬²ÅÐèÒª±£´æ %guidata(hObject, handles);%ÕâÀïÓÉÓÚhandlesÃ»ÓÐ¸Ä±ä£¬¹ÊÕâÀïÆäÊµÃ»ÓÐ±ØÒª£¬µ«ÊÇÎªÁË±ÜÃâÇ±ÔÚµÄ²»±ØÒªÂé·³£¬½¨ÒéÔÚËùÓÐCallback¶¼Ìí¼Ó¸ÃÃüÁî¡£


% --- Executes during object creation, after setting all properties.
function edit60_CreateFcn(hObject, eventdata, handles)
% hObject    handle to edit60 (see GCBO)
% eventdata  reserved - to be defined in a future version of MATLAB
% handles    empty - handles not created until after all CreateFcns called

% Hint: edit controls usually have a white background on Windows.
%       See ISPC and COMPUTER.
if ispc && isequal(get(hObject,'BackgroundColor'), get(0,'defaultUicontrolBackgroundColor'))
    set(hObject,'BackgroundColor','white');
end


function edit61_Callback(hObject, eventdata, handles)
% hObject    handle to edit61 (see GCBO)
% eventdata  reserved - to be defined in a future version of MATLAB
% handles    structure with handles and user data (see GUIDATA)

% Hints: get(hObject,'String') returns contents of edit61 as text
%        str2double(get(hObject,'String')) returns contents of edit61 as a double
input=str2num(get(hObject,'String'));%¼ì²éÊäÈëÊÇ·ñÎª¿Õ. Èç¹ûÎª¿Õ,ÔòÄ¬ÈÏÏÔÊ¾Îª0
if (isempty(input))	
set(hObject,'String','0')
end
guidata(hObject,handles);%±£´æhandles½á¹¹Ìå£¬Ö»ÒªÔÚhandles½á¹¹ÌåÓÐ¸Ä±äÊ±£¬²ÅÐèÒª±£´æ %guidata(hObject, handles);%ÕâÀïÓÉÓÚhandlesÃ»ÓÐ¸Ä±ä£¬¹ÊÕâÀïÆäÊµÃ»ÓÐ±ØÒª£¬µ«ÊÇÎªÁË±ÜÃâÇ±ÔÚµÄ²»±ØÒªÂé·³£¬½¨ÒéÔÚËùÓÐCallback¶¼Ìí¼Ó¸ÃÃüÁî¡£


% --- Executes during object creation, after setting all properties.
function edit61_CreateFcn(hObject, eventdata, handles)
% hObject    handle to edit61 (see GCBO)
% eventdata  reserved - to be defined in a future version of MATLAB
% handles    empty - handles not created until after all CreateFcns called

% Hint: edit controls usually have a white background on Windows.
%       See ISPC and COMPUTER.
if ispc && isequal(get(hObject,'BackgroundColor'), get(0,'defaultUicontrolBackgroundColor'))
    set(hObject,'BackgroundColor','white');
end


function edit62_Callback(hObject, eventdata, handles)
% hObject    handle to edit62 (see GCBO)
% eventdata  reserved - to be defined in a future version of MATLAB
% handles    structure with handles and user data (see GUIDATA)

% Hints: get(hObject,'String') returns contents of edit62 as text
%        str2double(get(hObject,'String')) returns contents of edit62 as a double
input=str2num(get(hObject,'String'));%¼ì²éÊäÈëÊÇ·ñÎª¿Õ. Èç¹ûÎª¿Õ,ÔòÄ¬ÈÏÏÔÊ¾Îª0
if (isempty(input))	
set(hObject,'String','0')
end
guidata(hObject,handles);%±£´æhandles½á¹¹Ìå£¬Ö»ÒªÔÚhandles½á¹¹ÌåÓÐ¸Ä±äÊ±£¬²ÅÐèÒª±£´æ %guidata(hObject, handles);%ÕâÀïÓÉÓÚhandlesÃ»ÓÐ¸Ä±ä£¬¹ÊÕâÀïÆäÊµÃ»ÓÐ±ØÒª£¬µ«ÊÇÎªÁË±ÜÃâÇ±ÔÚµÄ²»±ØÒªÂé·³£¬½¨ÒéÔÚËùÓÐCallback¶¼Ìí¼Ó¸ÃÃüÁî¡£


% --- Executes during object creation, after setting all properties.
function edit62_CreateFcn(hObject, eventdata, handles)
% hObject    handle to edit62 (see GCBO)
% eventdata  reserved - to be defined in a future version of MATLAB
% handles    empty - handles not created until after all CreateFcns called

% Hint: edit controls usually have a white background on Windows.
%       See ISPC and COMPUTER.
if ispc && isequal(get(hObject,'BackgroundColor'), get(0,'defaultUicontrolBackgroundColor'))
    set(hObject,'BackgroundColor','white');
end


function edit63_Callback(hObject, eventdata, handles)
% hObject    handle to edit63 (see GCBO)
% eventdata  reserved - to be defined in a future version of MATLAB
% handles    structure with handles and user data (see GUIDATA)

% Hints: get(hObject,'String') returns contents of edit63 as text
%        str2double(get(hObject,'String')) returns contents of edit63 as a double
input=str2num(get(hObject,'String'));%¼ì²éÊäÈëÊÇ·ñÎª¿Õ. Èç¹ûÎª¿Õ,ÔòÄ¬ÈÏÏÔÊ¾Îª0
if (isempty(input))	
set(hObject,'String','0')
end
guidata(hObject,handles);%±£´æhandles½á¹¹Ìå£¬Ö»ÒªÔÚhandles½á¹¹ÌåÓÐ¸Ä±äÊ±£¬²ÅÐèÒª±£´æ %guidata(hObject, handles);%ÕâÀïÓÉÓÚhandlesÃ»ÓÐ¸Ä±ä£¬¹ÊÕâÀïÆäÊµÃ»ÓÐ±ØÒª£¬µ«ÊÇÎªÁË±ÜÃâÇ±ÔÚµÄ²»±ØÒªÂé·³£¬½¨ÒéÔÚËùÓÐCallback¶¼Ìí¼Ó¸ÃÃüÁî¡£


% --- Executes during object creation, after setting all properties.
function edit63_CreateFcn(hObject, eventdata, handles)
% hObject    handle to edit63 (see GCBO)
% eventdata  reserved - to be defined in a future version of MATLAB
% handles    empty - handles not created until after all CreateFcns called

% Hint: edit controls usually have a white background on Windows.
%       See ISPC and COMPUTER.
if ispc && isequal(get(hObject,'BackgroundColor'), get(0,'defaultUicontrolBackgroundColor'))
    set(hObject,'BackgroundColor','white');
end


function edit64_Callback(hObject, eventdata, handles)
% hObject    handle to edit64 (see GCBO)
% eventdata  reserved - to be defined in a future version of MATLAB
% handles    structure with handles and user data (see GUIDATA)

% Hints: get(hObject,'String') returns contents of edit64 as text
%        str2double(get(hObject,'String')) returns contents of edit64 as a double
input=str2num(get(hObject,'String'));%¼ì²éÊäÈëÊÇ·ñÎª¿Õ. Èç¹ûÎª¿Õ,ÔòÄ¬ÈÏÏÔÊ¾Îª0
if (isempty(input))	
set(hObject,'String','0')
end
guidata(hObject,handles);%±£´æhandles½á¹¹Ìå£¬Ö»ÒªÔÚhandles½á¹¹ÌåÓÐ¸Ä±äÊ±£¬²ÅÐèÒª±£´æ %guidata(hObject, handles);%ÕâÀïÓÉÓÚhandlesÃ»ÓÐ¸Ä±ä£¬¹ÊÕâÀïÆäÊµÃ»ÓÐ±ØÒª£¬µ«ÊÇÎªÁË±ÜÃâÇ±ÔÚµÄ²»±ØÒªÂé·³£¬½¨ÒéÔÚËùÓÐCallback¶¼Ìí¼Ó¸ÃÃüÁî¡£


% --- Executes during object creation, after setting all properties.
function edit64_CreateFcn(hObject, eventdata, handles)
% hObject    handle to edit64 (see GCBO)
% eventdata  reserved - to be defined in a future version of MATLAB
% handles    empty - handles not created until after all CreateFcns called

% Hint: edit controls usually have a white background on Windows.
%       See ISPC and COMPUTER.
if ispc && isequal(get(hObject,'BackgroundColor'), get(0,'defaultUicontrolBackgroundColor'))
    set(hObject,'BackgroundColor','white');
end


function edit65_Callback(hObject, eventdata, handles)
% hObject    handle to edit65 (see GCBO)
% eventdata  reserved - to be defined in a future version of MATLAB
% handles    structure with handles and user data (see GUIDATA)

% Hints: get(hObject,'String') returns contents of edit65 as text
%        str2double(get(hObject,'String')) returns contents of edit65 as a double
input=str2num(get(hObject,'String'));%¼ì²éÊäÈëÊÇ·ñÎª¿Õ. Èç¹ûÎª¿Õ,ÔòÄ¬ÈÏÏÔÊ¾Îª0
if (isempty(input))	
set(hObject,'String','0')
end
guidata(hObject,handles);%±£´æhandles½á¹¹Ìå£¬Ö»ÒªÔÚhandles½á¹¹ÌåÓÐ¸Ä±äÊ±£¬²ÅÐèÒª±£´æ %guidata(hObject, handles);%ÕâÀïÓÉÓÚhandlesÃ»ÓÐ¸Ä±ä£¬¹ÊÕâÀïÆäÊµÃ»ÓÐ±ØÒª£¬µ«ÊÇÎªÁË±ÜÃâÇ±ÔÚµÄ²»±ØÒªÂé·³£¬½¨ÒéÔÚËùÓÐCallback¶¼Ìí¼Ó¸ÃÃüÁî¡£


% --- Executes during object creation, after setting all properties.
function edit65_CreateFcn(hObject, eventdata, handles)
% hObject    handle to edit65 (see GCBO)
% eventdata  reserved - to be defined in a future version of MATLAB
% handles    empty - handles not created until after all CreateFcns called

% Hint: edit controls usually have a white background on Windows.
%       See ISPC and COMPUTER.
if ispc && isequal(get(hObject,'BackgroundColor'), get(0,'defaultUicontrolBackgroundColor'))
    set(hObject,'BackgroundColor','white');
end


function edit66_Callback(hObject, eventdata, handles)
% hObject    handle to edit66 (see GCBO)
% eventdata  reserved - to be defined in a future version of MATLAB
% handles    structure with handles and user data (see GUIDATA)

% Hints: get(hObject,'String') returns contents of edit66 as text
%        str2double(get(hObject,'String')) returns contents of edit66 as a double
input=str2num(get(hObject,'String'));%¼ì²éÊäÈëÊÇ·ñÎª¿Õ. Èç¹ûÎª¿Õ,ÔòÄ¬ÈÏÏÔÊ¾Îª0
if (isempty(input))	
set(hObject,'String','0')
end
guidata(hObject,handles);%±£´æhandles½á¹¹Ìå£¬Ö»ÒªÔÚhandles½á¹¹ÌåÓÐ¸Ä±äÊ±£¬²ÅÐèÒª±£´æ %guidata(hObject, handles);%ÕâÀïÓÉÓÚhandlesÃ»ÓÐ¸Ä±ä£¬¹ÊÕâÀïÆäÊµÃ»ÓÐ±ØÒª£¬µ«ÊÇÎªÁË±ÜÃâÇ±ÔÚµÄ²»±ØÒªÂé·³£¬½¨ÒéÔÚËùÓÐCallback¶¼Ìí¼Ó¸ÃÃüÁî¡£


% --- Executes during object creation, after setting all properties.
function edit66_CreateFcn(hObject, eventdata, handles)
% hObject    handle to edit66 (see GCBO)
% eventdata  reserved - to be defined in a future version of MATLAB
% handles    empty - handles not created until after all CreateFcns called

% Hint: edit controls usually have a white background on Windows.
%       See ISPC and COMPUTER.
if ispc && isequal(get(hObject,'BackgroundColor'), get(0,'defaultUicontrolBackgroundColor'))
    set(hObject,'BackgroundColor','white');
end


function edit67_Callback(hObject, eventdata, handles)
% hObject    handle to edit67 (see GCBO)
% eventdata  reserved - to be defined in a future version of MATLAB
% handles    structure with handles and user data (see GUIDATA)

% Hints: get(hObject,'String') returns contents of edit67 as text
%        str2double(get(hObject,'String')) returns contents of edit67 as a double
input=str2num(get(hObject,'String'));%¼ì²éÊäÈëÊÇ·ñÎª¿Õ. Èç¹ûÎª¿Õ,ÔòÄ¬ÈÏÏÔÊ¾Îª0
if (isempty(input))	
set(hObject,'String','0')
end
guidata(hObject,handles);%±£´æhandles½á¹¹Ìå£¬Ö»ÒªÔÚhandles½á¹¹ÌåÓÐ¸Ä±äÊ±£¬²ÅÐèÒª±£´æ %guidata(hObject, handles);%ÕâÀïÓÉÓÚhandlesÃ»ÓÐ¸Ä±ä£¬¹ÊÕâÀïÆäÊµÃ»ÓÐ±ØÒª£¬µ«ÊÇÎªÁË±ÜÃâÇ±ÔÚµÄ²»±ØÒªÂé·³£¬½¨ÒéÔÚËùÓÐCallback¶¼Ìí¼Ó¸ÃÃüÁî¡£


% --- Executes during object creation, after setting all properties.
function edit67_CreateFcn(hObject, eventdata, handles)
% hObject    handle to edit67 (see GCBO)
% eventdata  reserved - to be defined in a future version of MATLAB
% handles    empty - handles not created until after all CreateFcns called

% Hint: edit controls usually have a white background on Windows.
%       See ISPC and COMPUTER.
if ispc && isequal(get(hObject,'BackgroundColor'), get(0,'defaultUicontrolBackgroundColor'))
    set(hObject,'BackgroundColor','white');
end


% --- Executes on button press in pushbutton3.
function pushbutton3_Callback(hObject, eventdata, handles)
% hObject    handle to pushbutton3 (see GCBO)
% eventdata  reserved - to be defined in a future version of MATLAB
% handles    structure with handles and user data (see GUIDATA)
syms a;               
syms b;
syms c;
syms d;
syms e;
syms f;
syms m;
syms n;
syms z;
syms dp;
m1 = get(handles.edit55,'String');
m2 = get(handles.edit56,'String'); 
m3 = get(handles.edit57,'String');
m4 = get(handles.edit58,'String');
m5 = get(handles.edit59,'String');
m6 = get(handles.edit60,'String');
m7 = get(handles.edit61,'String');
m8 = get(handles.edit62,'String');
m9 = get(handles.edit63,'String');
m10 = get(handles.edit64,'String');
m11 = get(handles.edit65,'String');
m12 = get(handles.edit66,'String');
m13 = get(handles.edit67,'String');
% aÊÇ×Ö·û´®±äÁ¿£¬ÎÒÃÇÐèÒªÊ¹ÓÃstr2doubleº¯Êý½«Æä×ª»»ÎªÊýÖµ£¬È»ºó²ÅÄÜ¼ÆËã£¬·ñÔò×Ö·û´®ÊÇÃ»·¨¼ÆËãµÄ
n1 = str2double(m1);
n2 = str2double(m2);
n3 = str2double(m3);
n4 = str2double(m4);
n5 = str2double(m5);
n6 = str2double(m6);
n7 = str2double(m7);
n8 = str2double(m8);
n9 = str2double(m9);
n10 = str2double(m10);
n11 = str2double(m11);
n12 = str2double(m12);
n13 = str2double(m13);
% ¸ñÊ½×ª»»ÎªÊýÖµ
a = n7/sin(n5*pi/180)+(n6-n8)/cos(n5*pi/180);
b = (n4-n6-n7*cot(n5*pi/180))*cos(n5*pi/180);
c = n10/n1*atan((n7+(n6-n8)*tan(n5*pi/180))/n11)+tan(n9*pi/180)-n9*pi/180-n9*pi/180+pi/2;
d = (n4-n6)*sin(n5*pi/180)-n7*cos(n5*pi/180);

format long
k = 0;
er = 1;
x = [];
x(1) = 3;
fun(z)=a-n12/n13*(atan(z/d)+tan(acos(0.5*n1*n2*cos(n9*pi/180)/sqrt(z*z+d^2)))-acos(0.5*n1*n2*cos(n9*pi/180)/sqrt(z*z+d^2))-c)+b-z;
dfun(z)=diff(fun(z));

while er >0.00001
   x(2)=x(1)-fun(x(1))/dfun(x(1));
   er = abs(x(2)-x(1));
   x(1) = x(2);
   k = k+1;
end
x(1)
k
f=real(x(1))
dp = 0.5*n1*n2+n3*n2-sqrt(f*f+(n4*sin(n5*pi/180)-n6*sin(n5*pi/180)-n7*cos(n5*pi/180))^2)
e=num2str(dp); %×ª»¯Îª×Ö·û´®
set(handles.edit68,'String',e);%±£´æ½á¹¹Ìå£¬½«½á¹û¸³Öµ¸øedit14¿Õ¼äµÄstringÊôÐÔ£¬ÓÚÊÇ¾Í¿ÉÒÔÏÔÊ¾½á¹ûÁË
guidata(hObject,handles);%¸üÐÂ½á¹¹Ìå


function edit68_Callback(hObject, eventdata, handles)
% hObject    handle to edit68 (see GCBO)
% eventdata  reserved - to be defined in a future version of MATLAB
% handles    structure with handles and user data (see GUIDATA)

% Hints: get(hObject,'String') returns contents of edit68 as text
%        str2double(get(hObject,'String')) returns contents of edit68 as a double
input=str2num(get(hObject,'String'));%¼ì²éÊäÈëÊÇ·ñÎª¿Õ. Èç¹ûÎª¿Õ,ÔòÄ¬ÈÏÏÔÊ¾Îª0
if (isempty(input))	
set(hObject,'String','0')
end
guidata(hObject,handles);%±£´æhandles½á¹¹Ìå£¬Ö»ÒªÔÚhandles½á¹¹ÌåÓÐ¸Ä±äÊ±£¬²ÅÐèÒª±£´æ %guidata(hObject, handles);%ÕâÀïÓÉÓÚhandlesÃ»ÓÐ¸Ä±ä£¬¹ÊÕâÀïÆäÊµÃ»ÓÐ±ØÒª£¬µ«ÊÇÎªÁË±ÜÃâÇ±ÔÚµÄ²»±ØÒªÂé·³£¬½¨ÒéÔÚËùÓÐCallback¶¼Ìí¼Ó¸ÃÃüÁî¡£
%Np = str2double(get(handles.edit1,'String'));
%Ng = str2double(get(handles.edit2,'String'));
%mn = str2double(get(handles.edit3,'String'));
%alpha = deg2rad(str2double(get(handles.edit4,'String')));%pay attention deg2rad(20)
%hax = str2double(get(handles.edit5,'String'));
%wp = str2double(get(handles.edit6,'String'));
%xp = str2double(get(handles.edit7,'String'));
%xg = str2double(get(handles.edit8,'String'));

%×¢Òâ ÒÔÏÂÊÇÇóµÈ±äÎ»³ÝÂÖ£¬¼´ xg + xp =0
%Çó´«¶¯±È
%mg = Ng / Np;
%wg = wp / mg;
%Çó·Ö¶ÈÔ²°ë¾¶r R
%r = mn * Np / 2;
%R = mn * Ng / 2;
%Çó»ùÔ²°ë¾¶
%rb = r * cos(alpha);
%Rb = R * cos(alpha);
%¶¨Òå³Ý¶¥¸ß²¢ÇÒÇó³Ý¶¥Ô²°ë¾¶
%hap = (hax + xp) * mn;
%hag = (hax + xg) * mn;
%ro = r + hap;
%Ro = R + hag;
%S1=0;
%½ÓÏÂÀ´ÇóÉäÁ÷Æ«ÖÃSÒÔ¼°ÈëÉä½ÇbetaµÄ·¶Î§
% 0<S<S0
%S0 = (hag * mg - hap)/(mg + 1) + (hag^2 - hap^2)/(2 * r * (mg + 1));
%m1=num2str(S1);
%m2=num2str(S0);
%set(handles.edit9,'String',m1)
%set(handles.edit10,'String',m2);%±£´æ½á¹¹Ìå£¬½«½á¹û¸³Öµ¸øedit14¿Õ¼äµÄstringÊôÐÔ£¬ÓÚÊÇ¾Í¿ÉÒÔÏÔÊ¾½á¹ûÁË


% --- Executes during object creation, after setting all properties.
function edit68_CreateFcn(hObject, eventdata, handles)
% hObject    handle to edit68 (see GCBO)
% eventdata  reserved - to be defined in a future version of MATLAB
% handles    empty - handles not created until after all CreateFcns called

% Hint: edit controls usually have a white background on Windows.
%       See ISPC and COMPUTER.
if ispc && isequal(get(hObject,'BackgroundColor'), get(0,'defaultUicontrolBackgroundColor'))
    set(hObject,'BackgroundColor','white');
end
