# Supplementary material for: Determination of an Optimal Oil Jet Nozzle Layout for Helical Gear Lubrication: Mathematical Modeling, Numerical Simulation, and Experimental Validation
Source: Hindawi journal article supplement (doi:10.1155/2020/2187027), 2020-05-12
Supplement: f1 [file 2187027.f1.zip › 2187027.f1/run/func.m]

function f=func(Lp1)

% x=320;
% y=100;
% z=50;
% n1=deg2rad(95);
% n2=deg2rad(120);
% % 
% % np=17;
% % m=6.036;
% % n4=deg2rad(20);
% % n3=deg2rad(25);
% % d0=304.8;
% % n7=deg2rad(11.4);
% % R=259.424;
% % 
% % ng=81;
% % n8=deg2rad(70.4500001);
% % 
% % n5=0.46*(1-1/(ng/np)^2);
% ha=1;
% % Ag=99.95;
% % Hg=99.95-84.192;
% % n6=64.8;
% Vj=10;
% % wp=5747.5*2*pi/60;
% 
% np=22;
% ng=80;
% m=4.08;
% n4=deg2rad(20);
% n3=deg2rad(25);
% d0=304.8;
% R=249.641;
% n7=deg2rad(10.357);
% n8=deg2rad(40.8166);
% n6=43.2;
% wp=20900*pi/60;
% Ag=190;
% n5=0.46*(1-1/(ng/np)^2);
global np ng m n4 n3 wp n5 d0 ha R n6 n7 n8 Ag x y z n1 n2 Vj
digits(20)

Rm=R-n6/2;
n9=n8+atan((2.25*m*cos(n3)*(Rm/R)-m*cos(n3)*(Rm/R)*(ha+n5))/R);

%p=vpa(solve((x+(z-t)*tan(n1)*cos(n2))^2+(y-(z-t)*tan(n1)*sin(n2))^2-(Ag-t)^2*(tan(n9))^2,t));

%z1=real(p(1));
syms t;
p=double(vpa(solve((x+(z-t)*tan(n1)*cos(n2))^2+(y-(z-t)*tan(n1)*sin(n2))^2-(Ag-t)^2*(tan(n9))^2,t)));
z1=real(p(1));
R1=(Ag-z1)*cos(atan((2.25*m*cos(n3)*(Rm/R)-m*cos(n3)*(Rm/R)*(ha+n5))/R))/cos(n9);
d1=2*R1*sin(n7);
n10=asin((R1+(Rm*(d0*sin(n3)-Rm))/R1)/d0);
m1=m*cos(n10)*R1/R;
nv=[sin(n1)*cos(n2) -sin(n1)*sin(n2) cos(n1)];
np1=[-sin(n7+n8) 0 cos(n7+n8)];
ng1=[0 0 1];
n11=acos(nv*np1');
xe=x-y/tan(n2);
ze=z-y/(tan(n1)*sin(n2));
q=Ag-R1*sin(n7)-R1*cos(n7)*tan(n7+n8);
xe1=(tan(n7+n8)*(ze-q)+xe)/(1+(tan(n7+n8))^2);
ze1=tan(n7+n8)*xe1+q;
n12=acos(y/((x-xe1)^2+y^2+(z-ze1)^2)^0.5);
x1=x+(z-z1)*tan(n1)*cos(n2);
Ra1=((x+(z-z1)*tan(n1)*cos(n2))^2+(y-(z-z1)*tan(n1)*sin(n2))^2)^0.5;
n17=atan(tan(n4)/cos(n3));
n15=asin(sin(n7)*cos(n17));
n16=asin(sin(n8)*cos(n17));
n14=acos(x1/Ra1)+acos(cos(n8)/cos(n16))/sin(n16)-acos(tan(n16)/tan(n8))-acos(cos(n9)/cos(n16))/sin(n16)+acos(tan(n16)/tan(n9));
n13=(ng/np)*n14+acos(cos(n7)/cos(n15))/sin(n15)-acos(tan(n15)/tan(n7))-n12;
rz=((R1*cos(n7)-xe1)^2+(Ag-R1*sin(n7)-xe1)^2)^0.5;
ra=rz*cos(n12);
ra1=0.5*np*m1/cos(n10)+(ha+n5)*m1;
n19=n7+atan((2.25*m*cos(n3)*(Rm/R)-m*cos(n3)*(Rm/R)*(ha-n5))/R);
dp=(ra1-(Lp1^2+ra^2)^0.5)/(cos(n19))^2;
% Lp=((ra1-dp*(cos(n19))^2)^2-ra^2)^0.5;
n18=n7+atan(((ha+n5)*m1-dp*cos(n19))/R1);
n20=atan(Lp1/ra)+acos(cos(n18)/cos(n15))/sin(n15)-acos(tan(n15)/tan(n18));
h1=sin(n11)*Vj*(n20-n13)/wp;
f=((y-(z-z1)*tan(n1)*sin(n2))/(-sin(n1)*sin(n2)))*sin(n11)-h1-(d1/2-(z-y/(sin(n2)*tan(n1))-Ag+d1/(2*(ng/np)*tan(n8)))*sin(n7+n8))*sin(atan(sin(n7+n8)/(tan(n1)*sin(n2))))-Lp1;
%(d1/2-(z-y/(sin(n2)*tan(n1))-Ag+d1/(2*(ng/np)*tan(n8)))*sin(n7+n8))*sin(atan(sin(n7+n8)/(tan(n1)*sin(n2))))
end
