# Supplementary material for: Determination of an Optimal Oil Jet Nozzle Layout for Helical Gear Lubrication: Mathematical Modeling, Numerical Simulation, and Experimental Validation
Source: Hindawi journal article supplement (doi:10.1155/2020/2187027), 2020-05-12
Supplement: f1 [file 2187027.f1.zip › 2187027.f1/run/myfun.m]

function F = myfun(x)
global alpha wp;
global Vj;
global mg r R rb Rb ro Ro S Rs Ri beta rs wg ri;
Lp = x(1);
Lg = x(2);
%¶¨Òå´ó³ÝÂÖ×ªËÙ
%¶¨Òåt=0ÒÔ¼°t=1Ê±¿ÌµÄÐ¡³ÝÂÖÎ»ÖÃ²ÎÊý£¬t=0Ê±¿Ì´ó³ÝÂÖÎ»ÖÃ²ÎÊý£¬ÖÐ¼äÁ¿phiogÊÇ´ó³ÝÂÖ³Ý¶¥Ô²Ñ¹Á¦½Ç£¬x, rx, ra, phip2
syms thetap1 thetap2 thetag1 phiog     rx ra phip2;
%¶¨Òåt=0ÒÔ¼°t=1Ê±¿ÌµÄ´ó³ÝÂÖÎ»ÖÃ²ÎÊý£¬
syms thetag2 thetag3 thetap4 phiop     Rx Ra phig3;


%Çóthetap1
%ÏÈÇóÖÐ¼äÁ¿phiog£¬¼´´ó³ÝÂÖ³Ý¶¥Ô²Ñ¹Á¦½Ç
phiog = acos(Rb / Ro);
thetag1 = acos(Rs / Ro) - invv(phiog) + invv(alpha);
thetap1 = mg * thetag1 + invv(alpha) - beta;

%Çóthatap2
%ÖÐ¼ä±äÁ¿°üÀ¨x, rx, ra, phip2
x1 = Ri * tan(beta);
rx = r - S + x1;
ra = rx * cos(beta);
%rii =((Lp^2 + ra^2)^0.5)
%phip2 = (acos(rb/rii))
%phip2 = (acos(rb/((Lp^2 + ra^2)^0.5)))
%thetap2 = (atan (Lp / ra) + invv(acos(rb/((Lp^2 + ra^2)^0.5))));
% Lp = (Ro^2 - Rs^2)^0.5 / cos(beta) - Vj * (thetap2 - thetap1) / wp - ...
% (r - S + Ri * tan(beta))*sin(beta)
% Lp = (Ro^2 - Rs^2)^0.5 / cos(beta) - Vj * ((atan (Lp / ra) + invv(acos(rb/((Lp^2 + ra^2)^0.5)))) - ...
%     thetap1) / wp - (r - S + Ri * tan(beta))*sin(beta);
F(1) =(Ro^2 - Rs^2)^0.5 / cos(beta) - Vj * ((atan (Lp / ra) + invv(acos(rb/((Lp^2 + ra^2)^0.5)))) - thetap1) / wp - (r - S + Ri * tan(beta))*sin(beta)-Lp;

%ÇóLg
%Çóthetag2 thetap4
%ÏÈÇóÖÐ¼ä±äÁ¿phiop
phiop = acos(rb / ro);
thetap4 = acos(rs / ro) - invv(phiop) + invv(alpha);
thetag2 = mg * thetap4 + invv(alpha) + beta;

%Çóthetag3
%ÓÃÐ¡³ÝÂÖ´¦ÇóµÃµÄxÖµ¡£x=Ri*tan(beta)
x2 = ri * tan(beta);
Rx = R + S - x2;
Ra = Rx * cos(beta);
%µü´ú¹«Ê½
%Rii = ((Lg^2 + Ra^2)^0.5)
%phig3 = (acos(Rb/((Lg^2 + Ra^2)^0.5)))
%thetag3 = atan(Lg / Ra) + invv (phig3)
%thetag3 = (atan(Lg / Ra) + invv ((acos(Rb/((Lg^2 + Ra^2)^0.5)))))
F(2) = (ro^2 - rs^2)^0.5 / cos(beta) - Vj * ((atan(Lg / Ra) + invv ((acos(Rb/((Lg^2 + Ra^2)^0.5))))) - thetag2) / wg + (R + S - ri * tan(beta) )* sin(beta) - Lg;
