# Supplementary figures and images for: Determination of an Optimal Oil Jet Nozzle Layout for Helical Gear Lubrication: Mathematical Modeling, Numerical Simulation, and Experimental Validation
Source: Hindawi journal article supplement (doi:10.1155/2020/2187027), 2020-05-12

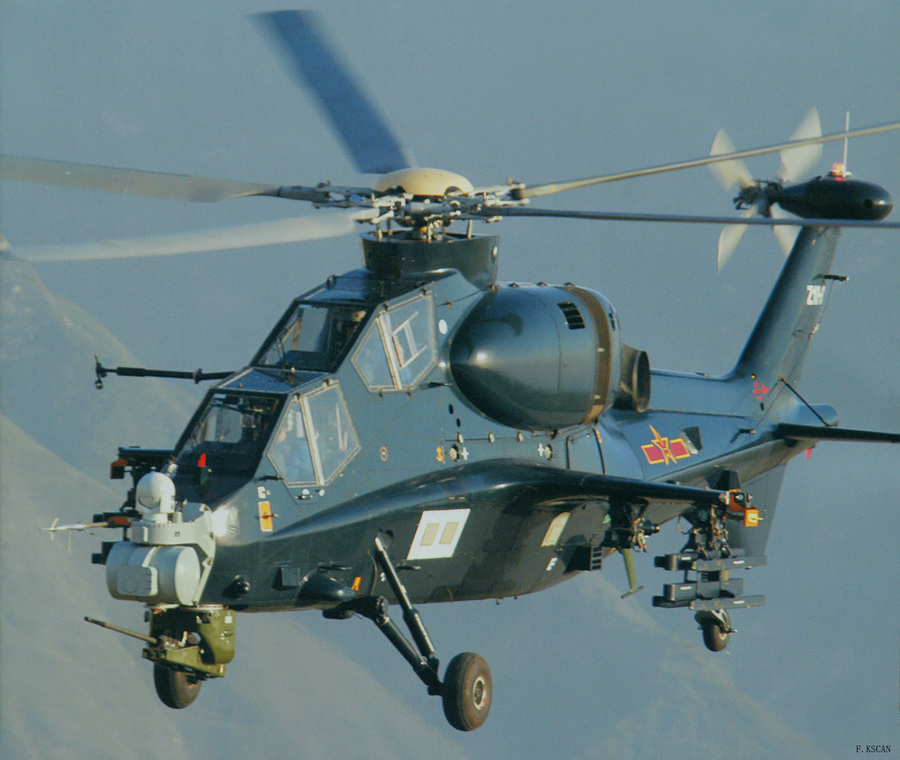

Supplement: f1 [file 2187027.f1.zip › 2187027.f1/run/background.jpg]
